# Supplementary material for: Synthesis of allylic and homoallylic alcohols from unsaturated cyclic ethers using a mild and selective C–O reduction approach
Source: Royal Society of Chemistry journal article supplement (doi:10.1039/c2cc33551d), 2012-01-01

## Synthesis of Allylic and Homoallylic Alcohols from Unsaturated Cyclic Ethers Using a Mild and Selective C-O Reduction Approach

Daniel J. Mack,<sup>b</sup> Boying Guo,<sup>a</sup> and Jon T. Njardarson<sup>\*a,b</sup>

<sup>a</sup>Department of Chemistry and Biochemistry, The University of Arizona, 1306 E. University Blvd., Tucson, Arizona 85721, USA

<sup>b</sup>Department of Chemistry and Chemical Biology, Baker Laboratory, Cornell University, Ithaca, New York 14853, USA

### Supporting Information

#### Table of Contents:

|                                                                                                             |              |
|-------------------------------------------------------------------------------------------------------------|--------------|
| <b>General Procedure for B(C<sub>6</sub>F<sub>5</sub>)<sub>3</sub>-catalyzed reduction of cyclic ethers</b> | <b>01</b>    |
| <b>Characterization data for new compounds</b>                                                              | <b>02-09</b> |
| <b>NMR Spectra for new compounds</b>                                                                        | <b>10-34</b> |

**General Information:** Commercial reagents were purchased and used without further purification. All glassware was flame dried under vacuum and reactions were performed under a nitrogen atmosphere, unless otherwise stated. Toluene, dichloromethane, diethyl ether, and THF were dried over a column of alumina. Benzene was distilled from sodium/benzophenone ketyl. Flash chromatography was done with Grace DAVISIL F60 40-63 $\mu$ m 60Å silica, and thin layer chromatography (TLC) was performed with EMD 250  $\mu$ m silica gel 60-F<sub>254</sub> plates. <sup>1</sup>H and <sup>13</sup>C NMR data was acquired on a Varian Inova 600, Bruker DRX 500, or Bruker DRX 600 and referenced to residual protic solvent (CDCl<sub>3</sub> <sup>1</sup>H [7.26 ppm], CDCl<sub>3</sub> <sup>13</sup>C [77.00 ppm], C<sub>6</sub>F<sub>6</sub> <sup>19</sup>F [-164.90 ppm]) or tetramethylsilane (0.00 ppm). Infrared spectrum were acquired on a Shimadzu Prestige FT-IR. Optical rotations were measured on a Rudolph Instruments Autopol IV polarimeter. High-resolution mass spectrometry was performed at The University of Arizona Mass Spectral Facility.

#### General Procedure for B(C<sub>6</sub>F<sub>5</sub>)<sub>3</sub>-catalyzed reduction of cyclic ethers

To a flame-dried vial containing a stir bar was added cyclic ether (1 eq) and dichloromethane (0.1 M), and B(C<sub>6</sub>F<sub>5</sub>)<sub>3</sub> (0.05 eq). Triethylsilane (1.1 eq) was added to this solution, at room temperature, over 1 hour, and the reaction was allowed to stir at room temperature until TLC indicated completion of the reduction. TBAF (1.0 M in THF, 1.5 eq) was added in one portion, and the reaction was stirred until TLC indicated complete consumption of the triethylsilyl ether. The reaction was diluted with DI water, the organic layers were separated, and the organic layer was washed with brine, dried over MgSO<sub>4</sub> and concentrated. Compounds were purified via column chromatography, yielding the desired alcohol. For all alcohol products we used either 20-35% Ethyl acetate/hexanes or 7% methanol/methylene chlorides as eluents.

**(Z)-but-2-en-1-ol (1)**

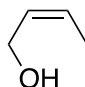

**1**

<sup>1</sup>H NMR (499 MHz, Chloroform-d) δ 5.64 – 5.56 (m, 2H), 4.19 (d, *J* = 4.4 Hz, 2H), 2.43 (s, 1H), 1.66 (d, *J* = 5.2 Hz, 3H); <sup>13</sup>C NMR (126 MHz, CDCl<sub>3</sub>) δ 129.26, 126.73, 57.95, 12.85; FTIR (thin film) 3343, 3022, 2922, 2874, 1449, 1032, 980 cm<sup>-1</sup>; HRMS (EI<sup>+</sup>) *m/z* 72.0572 [calculated mass for C<sub>4</sub>H<sub>8</sub>O (M)<sup>+</sup> 72.0575].

**(Z)-undec-2-en-4-ol (2)**

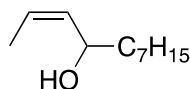

**2**

<sup>1</sup>H NMR (499 MHz, Chloroform-d) δ 5.60 (dq, *J* = 11.0, 7.1 Hz, 1H), 5.43 (ddt, *J* = 10.8, 7.0, 1.8 Hz, 1H), 4.50 (dtd, *J* = 9.7, 6.8, 3.7 Hz, 1H), 1.72 (dd, *J* = 6.9, 1.7 Hz, 3H), 1.68 – 1.59 (m, 1H), 1.52 – 1.42 (m, 1H), 1.43 – 1.24 (m, 11H), 0.91 (t, *J* = 6.9 Hz, 3H); <sup>13</sup>C NMR (126 MHz, CDCl<sub>3</sub>) δ 133.62, 126.23, 67.44, 37.48, 31.82, 29.58, 29.29, 25.35, 22.66, 14.10, 13.32; FTIR (thin film) 3350, 2926, 2857, 1456, 1001, 725 cm<sup>-1</sup>; HRMS (EI<sup>+</sup>) *m/z* 170.1668 [calculated mass for C<sub>11</sub>H<sub>22</sub>O (M)<sup>+</sup> 170.1671].

**(E)-4-phenylbut-3-en-1-ol (3)**

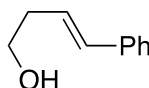

**3**

<sup>1</sup>H NMR (499 MHz, Chloroform-d) δ 7.40 – 7.18 (m, 5H), 6.50 (d, *J* = 15.9 Hz, 1H), 6.21 (dt, *J* = 15.9, 7.2 Hz, 1H), 3.76 (q, *J* = 6.2 Hz, 2H), 2.49 (dtd, *J* = 7.7, 6.4, 1.4 Hz, 2H), 1.44 (s, 1H); <sup>13</sup>C NMR (126 MHz, CDCl<sub>3</sub>) δ 137.20, 132.84, 128.51, 127.26, 126.29, 126.06, 62.03, 36.43; FTIR (thin film) 3347, 3080, 3057, 3024, 2926, 2876, 1493, 1040, 962, 743, 692 cm<sup>-1</sup>; HRMS (EI<sup>+</sup>) *m/z* 148.0885 [calculated mass for C<sub>10</sub>H<sub>12</sub>O (M)<sup>+</sup> 148.0888].

**(Z)-2-ethylideneoctan-1-ol (4)**

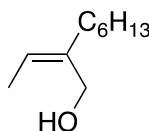

**4**

<sup>1</sup>H NMR (499 MHz, Chloroform-d) δ 5.39 (q, *J* = 7.0 Hz, 1H), 4.15 (d, *J* = 5.0 Hz, 2H), 2.10 (ddt, *J* = 9.1, 6.9, 1.3 Hz, 2H), 1.67 (d, *J* = 7.0 Hz, 3H), 1.47 – 1.36 (m, 2H), 1.36 – 1.25 (m, 6H), 1.17 (t, *J* = 5.4 Hz, 1H), 0.88 (t, *J* = 6.8 Hz, 3H); <sup>13</sup>C NMR (126 MHz, CDCl<sub>3</sub>) δ 139.31, 122.46, 59.99, 35.21, 31.77, 29.14, 28.30, 22.64, 14.09, 13.10; FTIR (thin film) 3327, 2957, 2928, 2859, 1456, 1379, 1242, 1005, 833, 743, 725 cm<sup>-1</sup>; HRMS (EI<sup>+</sup>) *m/z* 156.1511 [calculated mass for C<sub>10</sub>H<sub>20</sub>O (M)<sup>+</sup> 156.1514].

**(Z)-2-(p-tolyl)but-2-en-1-ol (5)**

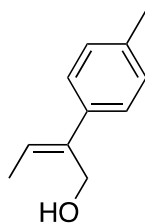

**5**

$^1\text{H}$  NMR (499 MHz, Chloroform-d)  $\delta$  7.32 (d,  $J = 8.1$  Hz, 2H), 7.14 (d,  $J = 7.9$  Hz, 2H), 5.93 (q,  $J = 7.0$  Hz, 1H), 4.58 (d,  $J = 5.7$  Hz, 2H), 2.34 (s, 3H), 1.88 (d,  $J = 7.0$  Hz, 3H), 1.30 (t,  $J = 5.8$  Hz, 1H);  $^{13}\text{C}$  NMR (126 MHz,  $\text{CDCl}_3$ )  $\delta$  139.31, 137.99, 136.72, 129.18, 126.08, 125.78, 59.50, 21.05, 14.02; FTIR (thin film) 3350, 3022, 2920, 2862, 1512, 1437, 1024, 982, 810  $\text{cm}^{-1}$ ; HRMS ( $\text{EI}^+$ )  $m/z$  162.1042 [calculated mass for  $\text{C}_{11}\text{H}_{14}\text{O}$  ( $\text{M}$ ) $^+$  162.1045].

**4-butyloct-3-en-1-ol (6)**

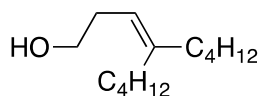

**6**

$^1\text{H}$  NMR (499 MHz, Chloroform-d)  $\delta$  5.09 (t,  $J = 7.4$  Hz, 1H), 3.62 (q,  $J = 6.3$  Hz, 2H), 2.30 (q,  $J = 6.8$  Hz, 2H), 2.02 (dt,  $J = 14.5, 7.5$  Hz, 4H), 1.41 – 1.24 (m, 9H), 0.94 – 0.87 (m, 6H);  $^{13}\text{C}$  NMR (126 MHz,  $\text{CDCl}_3$ )  $\delta$  143.78, 119.44, 62.71, 36.74, 31.32, 30.84, 30.48, 29.96, 22.90, 22.55, 14.05, 14.03; FTIR (thin film) 3331, 2957, 2930, 2872, 2860, 1456, 1049, 735  $\text{cm}^{-1}$ ; HRMS ( $\text{EI}^+$ )  $m/z$  184.1830 [calculated mass for  $\text{C}_{12}\text{H}_{24}\text{O}$  ( $\text{M}$ ) $^+$  184.1827].

**(Z)-cyclooct-2-enol (7)**

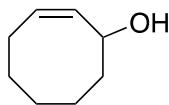

**7**

$^1\text{H}$  NMR (499 MHz, Chloroform-d)  $\delta$  5.61 (dddd,  $J = 10.7, 8.8, 7.2, 1.6$  Hz, 1H), 5.52 (ddd,  $J = 10.8, 6.7, 1.2$  Hz, 1H), 4.70 – 4.60 (m, 1H), 2.24 – 2.02 (m, 2H), 1.95 – 1.86 (m, 1H), 1.71 – 1.32 (m, 8H);  $^{13}\text{C}$  NMR (126 MHz,  $\text{CDCl}_3$ )  $\delta$  134.94, 128.68, 69.50, 38.67, 29.10, 26.34, 25.94, 23.73; FTIR (thin film) 3325, 3017, 2926, 2857, 1136, 1055, 986, 849, 752, 667  $\text{cm}^{-1}$ ; HRMS ( $\text{EI}^+$ )  $m/z$  126.1039 [calculated mass for  $\text{C}_8\text{H}_{14}\text{O}$  ( $\text{M}$ ) $^+$  126.1045].

**TES-Protected Diol (8)**

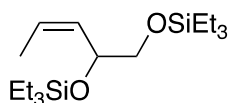

**8**

$^1\text{H}$  NMR (499 MHz, Chloroform-d)  $\delta$  5.53 (dq,  $J = 11.0, 6.9, 1.2$  Hz, 1H), 5.37 – 5.28 (m, 1H), 4.49 (dddd,  $J = 8.6, 6.8, 5.8, 1.2$  Hz, 1H), 3.57 (dd,  $J = 10.1, 6.5$  Hz, 1H), 3.42 (dd,  $J = 10.1, 5.8$  Hz, 1H), 1.66 (dd,  $J = 6.9, 1.8$  Hz, 3H), 0.95 (td,  $J = 7.9, 2.0$  Hz, 18H), 0.59 (q,  $J = 8.1$  Hz, 12H);  $^{13}\text{C}$  NMR (126 MHz,  $\text{CDCl}_3$ )  $\delta$  132.03, 125.54, 69.38, 67.40, 13.56, 6.78, 6.77, 4.89, 4.45; FTIR

(thin film) 3019, 2955, 2913, 2878, 1460, 1414, 1238, 1121, 1092, 1005, 964, 785, 743  $\text{cm}^{-1}$ ;  
HRMS (EI<sup>+</sup>)  $m/z$  330.2415 [calculated mass for  $\text{C}_{17}\text{H}_{38}\text{O}_2\text{Si}_2$  (M)<sup>+</sup> 330.2410].

**(E)-3-phenylpent-3-en-1-ol (9)**

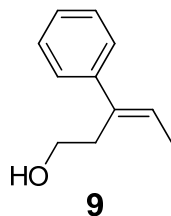

<sup>1</sup>H NMR (400 MHz,  $\text{CDCl}_3$ )  $\delta$  7.35 – 7.27 (m, 4H), 7.24 – 7.20 (m, 1H), 5.91 (qt,  $J = 6.9, 0.6$  Hz, 1H), 3.64 (t,  $J = 6.8$  Hz, 2H), 2.86 – 2.80 (m, 2H), 1.85 (dt,  $J = 6.9, 0.6$  Hz, 3H); <sup>13</sup>C NMR (100 MHz,  $\text{CDCl}_3$ )  $\delta$  142.64, 136.83, 128.35, 126.79, 126.24, 125.79, 61.22, 32.87, 14.37; IR (neat) 3338, 3028, 2956, 2933, 2877, 1492, 1442, 1045, 1020, 758, 742, 698  $\text{cm}^{-1}$ ; HRMS (EI<sup>+</sup>)  $m/z$  162.1042 [(M<sup>+</sup>) calcd for  $\text{C}_{11}\text{H}_{14}\text{O}$  162.1045].

**4-methyl-3-phenylpent-3-en-1-ol (10)**

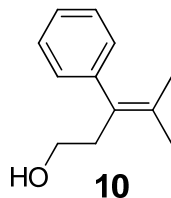

<sup>1</sup>H NMR (600 MHz,  $\text{CDCl}_3$ )  $\delta$  7.33 – 7.29 (m, 2H), 7.23 – 7.20 (m, 1H), 7.11 – 7.08 (m, 2H), 3.54 (td,  $J = 6.8, 5.9$  Hz, 2H), 2.67 (t,  $J = 6.8$  Hz, 2H), 1.87 (s, 3H), 1.57 (s, 3H), 1.26 (t,  $J = 5.9$  Hz, 1H); <sup>13</sup>C NMR (100 MHz,  $\text{CDCl}_3$ )  $\delta$  143.24, 131.16, 130.81, 128.88, 128.12, 126.14, 60.91, 37.52, 22.32, 20.39; IR (neat) 3342, 3323, 3307, 2954, 2914, 2875, 1465, 1255, 1039, 702  $\text{cm}^{-1}$ ; HRMS (EI<sup>+</sup>)  $m/z$  176.1201 [(M<sup>+</sup>); calcd for  $\text{C}_{12}\text{H}_{16}\text{O}$ : 176.1201].

**(E)-3-phenylhex-3-en-1-ol (11)**

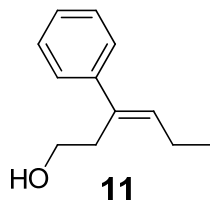

<sup>1</sup>H NMR (400 MHz,  $\text{CDCl}_3$ )  $\delta$  7.37 – 7.28 (m, 4H), 7.25 – 7.20 (m, 1H), 5.82 (t,  $J = 7.3$  Hz, 1H), 3.62 (td,  $J = 6.9, 5.9$  Hz, 2H), 2.81 (t,  $J = 6.9$  Hz, 2H), 2.25 (p,  $J = 7.5$  Hz, 2H), 1.33 (t,  $J = 5.9$  Hz, 1H), 1.07 (t,  $J = 7.5$  Hz, 3H); <sup>13</sup>C NMR (100 MHz,  $\text{CDCl}_3$ )  $\delta$  142.57, 135.28, 133.64, 128.33, 126.81, 126.30, 61.34, 33.11, 22.02, 14.40; IR (neat) 3338, 3331, 3024, 2962, 2931, 2872, 1492, 1456, 1444, 1043, 1029, 759, 696  $\text{cm}^{-1}$ ; HRMS (EI<sup>+</sup>)  $m/z$  176.1208 [(M<sup>+</sup>); calcd for  $\text{C}_{12}\text{H}_{16}\text{O}$ : 176.1201].

**(Z/E)-5-methyl-3-phenylhex-3-en-1-ol (12)**

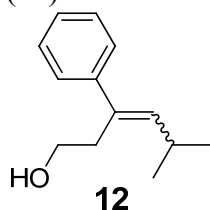

$^1\text{H}$  NMR (500 MHz,  $\text{CDCl}_3$ )  $\delta$  7.36 – 7.26 (m, 4H), 7.25 – 7.12 (m, 1H), 5.63 (d,  $J = 9.7$  Hz, 1H), 3.61 (t,  $J = 6.9$  Hz, 2H), 2.81 (dd,  $J = 7.1, 6.7$  Hz, 2H), 1.05 (dd,  $J = 6.6, 2.4$  Hz, 6H);  $^{13}\text{C}$  NMR (100 MHz,  $\text{CDCl}_3$ )  $\delta$  142.57, 140.65, 139.55, 138.18, 133.41, 128.34, 128.28, 128.23, 126.83, 126.72, 126.41, 61.47, 60.47, 42.45, 33.29, 28.00, 27.89, 23.37, 23.31; IR (neat) 3354, 3319, 2958, 2931, 2868, 1492, 1463, 1444, 1361, 1045, 1029, 761, 698  $\text{cm}^{-1}$ ; HRMS ( $\text{EI}^+$ )  $m/z$  190.1364 [ $\text{M}^+$ ] calcd for  $\text{C}_{13}\text{H}_{18}\text{O}$  190.1358]

**(E/Z)-4-methyl-3-phenylhex-3-en-1-ol (13)**

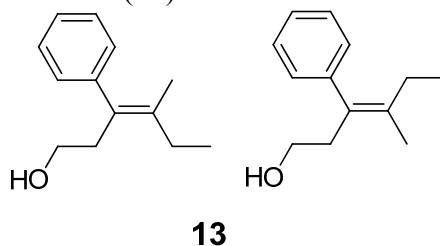

$^1\text{H}$  NMR (600 MHz,  $\text{CDCl}_3$ )  $\delta$  7.33 – 7.28 (m, 4H), 7.24 – 7.19 (m, 2H), 7.08 (tt,  $J = 8.0, 1.7$  Hz, 4H), 3.56 – 3.49 (m, 4H), 2.64 (dt,  $J = 13.8, 6.5$  Hz, 4H), 2.27 – 2.21 (m, 2H), 1.90 – 1.85 (m, 2H), 1.84 (s, 4H), 1.54 (d,  $J = 0.9$  Hz, 2H), 1.27 (dt,  $J = 8.7, 5.9$  Hz, 2H), 1.08 (t,  $J = 7.5$  Hz, 2H), 0.90 (t,  $J = 7.5$  Hz, 4H);  $^{13}\text{C}$  NMR (125 MHz,  $\text{CDCl}_3$ )  $\delta$  143.20, 133.52, 128.87, 128.68, 128.66, 128.12, 128.03, 126.13, 61.01, 60.74, 58.11, 40.36, 37.72, 36.99, 28.65, 27.06, 19.51, 17.27, 13.28, 13.21; IR (neat) 3355, 3338, 3331, 3039, 3024, 2962, 2930, 2872, 1492, 1446, 1456, 1444, 1043, 1029, 759, 696  $\text{cm}^{-1}$ ; HRMS ( $\text{EI}^+$ )  $m/z$  190.1356 [ $\text{M}^+$ ] calcd for  $\text{C}_{13}\text{H}_{18}\text{O}$  190.1358].

**(Z)-5-phenylpent-3-en-1-ol/(E)-5-phenylpent-4-en-1-ol (14)**

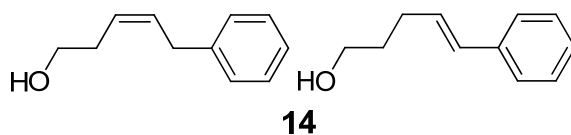

$^1\text{H}$  NMR (400 MHz,  $\text{CDCl}_3$ )  $\delta$  7.39 – 7.29 (m, 7H), 7.25 – 7.20 (m, 5H), 6.46 (dt,  $J = 15.8, 1.4$  Hz, 1H), 6.26 (dt,  $J = 15.8, 6.9$  Hz, 1H), 5.79 (dtt,  $J = 10.6, 7.5, 1.6$  Hz, 1.5H), 5.56 (dtt,  $J = 10.7, 7.4, 1.6$  Hz, 1.5H), 3.78 – 3.69 (m, 5H), 3.47 (dd,  $J = 7.5, 0.6$  Hz, 3H), 2.52 – 2.45 (m, 3H), 2.38 – 2.31 (m, 2H), 1.79 (ddd,  $J = 14.7, 7.4, 6.5$  Hz, 2H), 1.01 – 0.94 (m, 1.5), 0.59 – 0.52 (m, 1H);  $^{13}\text{C}$  NMR (100 MHz,  $\text{CDCl}_3$ )  $\delta$  140.71, 137.60, 131.41, 130.37, 130.02, 128.48, 128.47, 128.29, 126.94, 126.19, 125.96, 125.93, 62.39, 62.26, 33.58, 32.23, 30.81, 29.30, 6.77, 6.40; IR (neat) 3377, 3358, 3340, 3323, 3026, 2935, 2912, 1494, 1462, 1454, 1068, 1060, 1006, 740, 694  $\text{cm}^{-1}$ ; HRMS ( $\text{EI}^+$ )  $m/z$  162.1051 [ $\text{M}^+$ ] calcd for  $\text{C}_{11}\text{H}_{14}\text{O}$  162.1045].

**(Z)-undec-3-en-1-ol (15)**

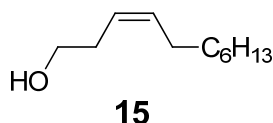

$^1\text{H}$  NMR (400 MHz,  $\text{CDCl}_3$ )  $\delta$  5.56 (dtt,  $J = 10.4, 7.3, 1.5$  Hz, 1H), 5.35 (dtt,  $J = 10.6, 7.4, 1.6$  Hz, 1H), 3.64 (dd,  $J = 12.3, 6.5$  Hz, 2H), 2.33 (dtdt,  $J = 7.1, 6.5, 1.4, 0.6$  Hz, 2H), 2.06 (dd,  $J = 13.3, 6.9$  Hz, 2H), 1.40 – 1.20 (m, 12H), 0.91 – 0.85 (m, 3H);  $^{13}\text{C}$  NMR (100 MHz,  $\text{CDCl}_3$ )  $\delta$  133.62, 124.90, 62.35, 31.84, 30.80, 29.70, 29.26, 29.19, 27.37, 22.65, 14.09; IR(neat) 3331, 3007, 2954, 2924, 2854, 1465, 1458, 1049, 1020, 970, 723  $\text{cm}^{-1}$ ; HRMS (EI $^+$ )  $m/z$  170.1676 [(M $^+$ ) calcd for  $\text{C}_{11}\text{H}_{22}\text{O}$  170.1671].

**(Z)-dodec-3-en-1-ol (16)**

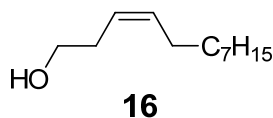

$^1\text{H}$  NMR (400 MHz,  $\text{CDCl}_3$ )  $\delta$  5.61 – 5.50 (m, 1H), 5.41 – 5.30 (m, 1H), 3.63 (ddd,  $J = 12.2, 7.8, 6.3$  Hz, 2H), 2.33 (dtdt,  $J = 7.1, 6.5, 1.4, 0.6$  Hz, 2H), 2.10 – 1.98 (m, 2H), 1.39 – 1.20 (m, 13H), 0.92 – 0.83 (m, 3H);  $^{13}\text{C}$  NMR (100 MHz,  $\text{CDCl}_3$ )  $\delta$  133.63, 124.90, 62.36, 31.88, 30.80, 29.70, 29.49, 29.31, 29.29, 27.38, 22.67, 14.10; IR (neat) 3323, 3007, 2954, 2924, 2854, 1467, 1456, 1377, 1049, 1024, 968, 721  $\text{cm}^{-1}$ ; HRMS (EI $^+$ )  $m/z$  166.1717 [(M-H $_2\text{O}$ ) $^+$  calcd for  $\text{C}_{12}\text{H}_{22}$  166.1722].

**(Z)-3-phenethylpent-3-en-1-ol (17)**

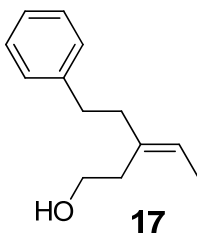

$^1\text{H}$  NMR (500 MHz,  $\text{CDCl}_3$ )  $\delta$  7.30 – 7.24 (m, 2H), 7.20 – 7.14 (m, 3H), 5.45 (q,  $J = 6.8$  Hz, 1H), 3.68 (t,  $J = 6.8$  Hz, 2H), 2.71 (dt,  $J = 18.8, 8.3$  Hz, 2H), 2.39 (t,  $J = 6.8$  Hz, 2H), 2.35 – 2.26 (m, 2H), 1.64 (d,  $J = 6.8$  Hz, 3H);  $^{13}\text{C}$  NMR (125 MHz,  $\text{CDCl}_3$ )  $\delta$  142.13, 135.33, 128.31, 128.26, 125.75, 122.40, 60.88, 38.82, 34.96, 33.27, 13.48; IR(neat) 3342, 3323, 3305, 3026, 2935, 2875, 2860, 1602, 1494, 1454, 1043, 1029, 744, 698  $\text{cm}^{-1}$ ; HRMS (EI $^+$ )  $m/z$  190.1349 [(M $^+$ ) calcd for  $\text{C}_{13}\text{H}_{18}\text{O}$  190.1358].

**(Z)-3-ethylidenedecan-1-ol (18)**

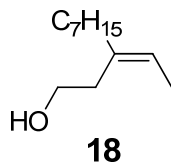

$^1\text{H}$  NMR (400 MHz,  $\text{CDCl}_3$ )  $\delta$  5.39 (qd,  $J = 6.8, 6.1$  Hz, 1H), 3.65 (td,  $J = 6.8, 5.9$  Hz, 2H), 2.34 (t,  $J = 6.8$  Hz, 2H), 2.03 – 1.91 (m, 2H), 1.63 (dtd,  $J = 6.8, 1.2, 0.6$  Hz, 3H), 1.46 – 1.13 (m, 10H), 0.97 (t,  $J = 7.9$  Hz, 1H), 0.91 – 0.85 (m, 3H);  $^{13}\text{C}$  NMR (100 MHz,  $\text{CDCl}_3$ )  $\delta$  136.10,

121.70, 60.89, 36.94, 33.00, 31.85, 29.38, 29.21, 28.31, 22.66, 14.08, 13.42; IR (neat) 3342, 2954, 2926, 2873, 2856, 1457, 1454, 1257, 1039, 848, 740  $\text{cm}^{-1}$ ; HRMS ( $\text{EI}^+$ )  $m/z$  184.1821 [ $(\text{M}^+)$  calcd for  $\text{C}_{12}\text{H}_{24}\text{O}$  184.1827].

**(Z)-3-(butan-2-ylidene) decan-1-ol (19)**

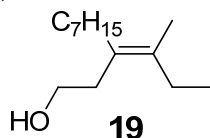

$^1\text{H}$  NMR (400 MHz,  $\text{CDCl}_3$ )  $\delta$  3.62 (t,  $J = 7.0$  Hz, 2H), 2.32 (td,  $J = 7.0, 0.6$  Hz, 2H), 2.07 (q,  $J = 7.5$  Hz, 2H), 2.01 – 1.94 (m, 2H), 1.66 (s, 3H), 1.43 (s, 1H), 1.37 – 1.20 (m, 11H), 0.96 (t,  $J = 7.5$  Hz, 3H), 0.92 – 0.84 (m, 3H);  $^{13}\text{C}$  NMR (100 MHz,  $\text{CDCl}_3$ )  $\delta$  134.04, 127.87, 61.41, 35.02, 32.31, 31.89, 29.81, 29.27, 28.76, 27.24, 22.66, 17.54, 14.10, 13.28; IR (neat) 3360, 3342, 2956, 2926, 2872, 2854, 1460, 1443, 1029, 1016, 760  $\text{cm}^{-1}$ ; HRMS ( $\text{EI}^+$ )  $m/z$  212.2145 [ $(\text{M}^+)$  calcd for  $\text{C}_{14}\text{H}_{28}\text{O}$  212.2140].

**(Z)-3-propylidenedecan-1-ol (20)**

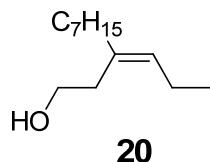

$^1\text{H}$  NMR (400 MHz,  $\text{CDCl}_3$ )  $\delta$  5.31 (t,  $J = 7.2$  Hz, 1H), 3.64 (t,  $J = 6.8$  Hz, 2H), 2.32 (t,  $J = 6.8$  Hz, 2H), 2.05 (p,  $J = 7.5$  Hz, 2H), 2.00 – 1.94 (m, 2H), 1.56 (s, 1H), 1.43 – 1.20 (m, 12H), 0.95 (t,  $J = 7.5$  Hz, 3H), 0.92 – 0.84 (m, 3H);  $^{13}\text{C}$  NMR (125 MHz,  $\text{CDCl}_3$ )  $\delta$  134.39, 129.89, 60.98, 36.84, 33.30, 31.87, 29.36, 29.22, 28.35, 22.68, 21.16, 14.72, 14.11; IR (neat) 3327, 2958, 2926, 2872, 2854, 1456, 1043, 759  $\text{cm}^{-1}$ ; HRMS ( $\text{EI}^+$ )  $m/z$  198.1978 [ $(\text{M}^+)$ ; calcd for  $\text{C}_{13}\text{H}_{26}\text{O}$  198.1984].

**(E)-3-((E)-hex-1-en-1-yl)non-3-en-1-ol (21)**

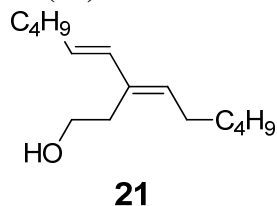

$^1\text{H}$  NMR (600 MHz,  $\text{CDCl}_3$ )  $\delta$  5.98 (dd,  $J = 15.8, 0.7$  Hz, 1H), 5.62 (dt,  $J = 15.7, 6.9$  Hz, 1H), 5.51 (t,  $J = 7.4$  Hz, 1H), 3.66 (dd,  $J = 12.9, 6.9$  Hz, 2H), 2.54 (t,  $J = 6.9$  Hz, 2H), 2.13 (dd,  $J = 14.9, 7.4$  Hz, 2H), 2.08 (dt,  $J = 7.9, 4.0$  Hz, 2H), 1.42 – 1.24 (m, 9H), 0.91 – 0.87 (m, 6H);  $^{13}\text{C}$  NMR (100 MHz,  $\text{CDCl}_3$ )  $\delta$  133.56, 133.38, 133.28, 127.96, 61.73, 32.56, 31.77, 31.59, 30.24, 29.53, 28.23, 22.57, 22.26, 14.03, 13.95; IR (neat) 3327, 3311, 3018, 2956, 2926, 2872, 2856, 1463, 1454, 1377, 1041, 1020, 964  $\text{cm}^{-1}$ ; HRMS ( $\text{EI}^+$ )  $m/z$  224.2144 [ $(\text{M}^+)$ ; calcd for  $\text{C}_{15}\text{H}_{28}\text{O}$  224.2140].

**(E)-3-((E)-non-1-en-1-yl)dodec-3-en-1-ol (22)**

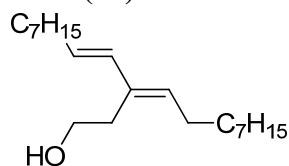

$^1\text{H}$  NMR (400 MHz,  $\text{CDCl}_3$ )  $\delta$  5.97 (dd,  $J = 15.8, 0.7$  Hz, 1H), 5.61 (dt,  $J = 15.7, 6.9$  Hz, 1H), 5.50 (t,  $J = 7.4$  Hz, 1H), 3.66 (t,  $J = 6.9$  Hz, 2H), 2.54 (t,  $J = 6.9$  Hz, 2H), 2.18 – 2.03 (m, 4H), 1.45 – 1.18 (m, 23H), 0.88 (t,  $J = 6.9$  Hz, 6H);  $^{13}\text{C}$  NMR (100 MHz,  $\text{CDCl}_3$ )  $\delta$  133.55, 133.36, 133.25, 128.00, 61.71, 32.91, 31.87, 31.81, 30.24, 29.87, 29.62, 29.54, 29.51, 29.42, 29.35, 29.27, 29.20, 29.17, 28.27, 22.65, 14.08; IR (neat) 3315, 3016, 2954, 2924, 2852, 1465, 1377, 1041, 1020, 964, 721  $\text{cm}^{-1}$ ; HRMS ( $\text{EI}^+$ )  $m/z$  308.3085 [ $\text{M}^+$ ]; cacl'd for  $\text{C}_{21}\text{H}_{40}\text{O}$  308.3079].

**(Z)-3-(butan-2-ylidene)undecan-1-ol (23)<sup>1</sup>**

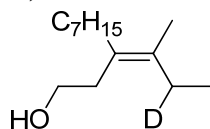

$^1\text{H}$  NMR (400 MHz,  $\text{CDCl}_3$ )  $\delta$  3.62 (t,  $J = 7.0$  Hz, 2H), 2.32 (td,  $J = 7.0, 0.7$  Hz, 2H), 2.08 – 2.00 (m, 1H), 2.00 – 1.95 (m, 2H), 1.66 (s, 3H), 1.38 – 1.20 (m, 11H), 0.95 (d,  $J = 7.5$  Hz, 3H), 0.92 – 0.85 (m, 3H);  $^{13}\text{C}$  NMR (100 MHz,  $\text{CDCl}_3$ )  $\delta$  134.01, 127.86, 61.41, 35.02, 32.30, 31.88, 29.81, 29.69, 29.27, 28.76, 22.66, 17.52, 14.10, 13.18; IR (neat) 3361, 3344, 2956, 2926, 2872, 2854, 1456, 1435, 1377, 1043, 1016, 740  $\text{cm}^{-1}$ ; HRMS ( $\text{EI}^+$ )  $m/z$  213.2208 [ $\text{M}^+$ ]; cacl'd for  $\text{C}_{24}\text{H}_{27}\text{DO}$  213.2203].

**3-phenylpentan-1-ol (24)<sup>2</sup>**

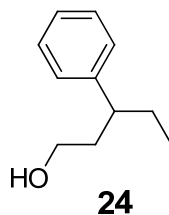

$^1\text{H}$  NMR (400 MHz,  $\text{CDCl}_3$ )  $\delta$  7.31 – 7.26 (m, 2H), 7.21 – 7.13 (m, 3H), 3.59 – 3.39 (m, 2H), 2.59 (tt,  $J = 10.1, 5.2$  Hz, 1H), 2.00 – 1.91 (m, 1H), 1.80 (dddd,  $J = 13.7, 10.0, 6.5, 5.4$  Hz, 1H), 1.74 – 1.57 (m, 2H), 1.11 (t,  $J = 5.3$  Hz, 1H), 0.78 (t,  $J = 7.4$  Hz, 3H);  $^{13}\text{C}$  NMR (100 MHz,  $\text{CDCl}_3$ )  $\delta$  144.95, 128.39, 127.67, 126.14, 61.27, 44.29, 39.26, 29.79, 12.08.

<sup>1</sup> 97%  $\text{Et}_3\text{SiD}$  from Aldrich was used, >95% of compound was found to be labeled according to HRMS

<sup>2</sup> Known compound, see *J. Org. Chem.*, **1992**, V57, 1237-1241



**2-(2,3-dimethyl-2,3-dihydro-1H-inden-1-yl)ethanol (25)**

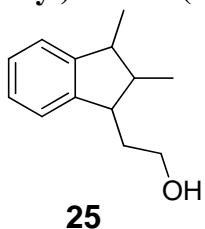

$^1\text{H}$  NMR (400 MHz,  $\text{CDCl}_3$ )  $\delta$  7.22 – 7.11 (m, 4H), 3.85 (td,  $J = 7.2, 4.6$  Hz, 2H), 2.74 (dt,  $J = 9.3, 5.9$  Hz, 1H), 2.63 (tt,  $J = 13.6, 6.8$  Hz, 1H), 2.14 (dtd,  $J = 13.9, 7.3, 5.6$  Hz, 1H), 1.92 (dtd,  $J = 13.8, 6.7, 3.2$  Hz, 1H), 1.68 – 1.56 (m, 1H), 1.35 (q,  $J = 5.1$  Hz, 1H), 1.30 (dd,  $J = 6.8, 2.4$  Hz, 3H), 1.22 (d,  $J = 6.6$  Hz, 3H);  $^{13}\text{C}$  NMR (100 MHz,  $\text{CDCl}_3$ )  $\delta$  147.81, 146.11, 126.44, 126.35, 123.00, 122.92, 61.42, 50.09, 47.86, 45.97, 36.34, 17.75, 17.56; IR (neat) 3338, 3330, 3024, 2962, 2931, 2872, 1043, 1029, 962, 759, 696  $\text{cm}^{-1}$ ; HRMS ( $\text{EI}^+$ )  $m/z$  190.1362 [ $\text{M}^+$ ] calcd for  $\text{C}_{13}\text{H}_{18}\text{O}$  190.1358].

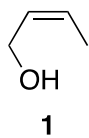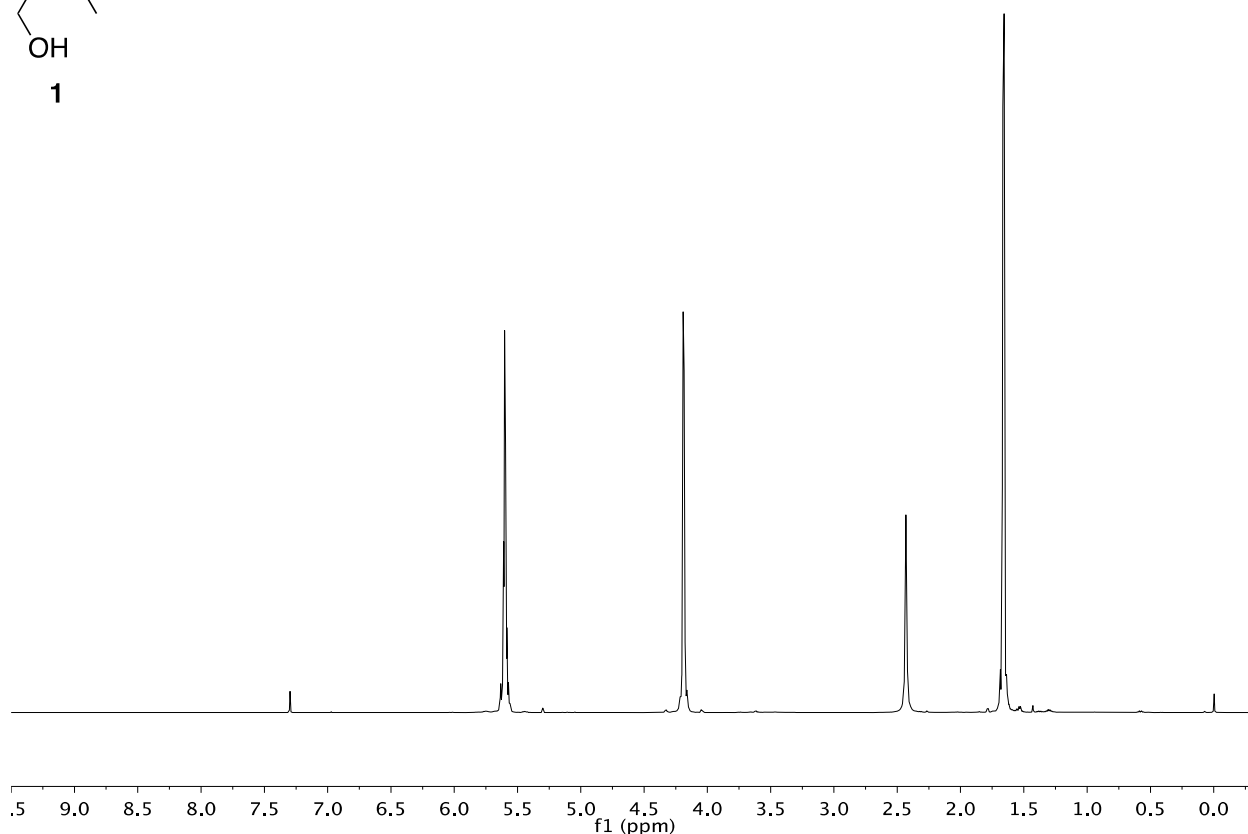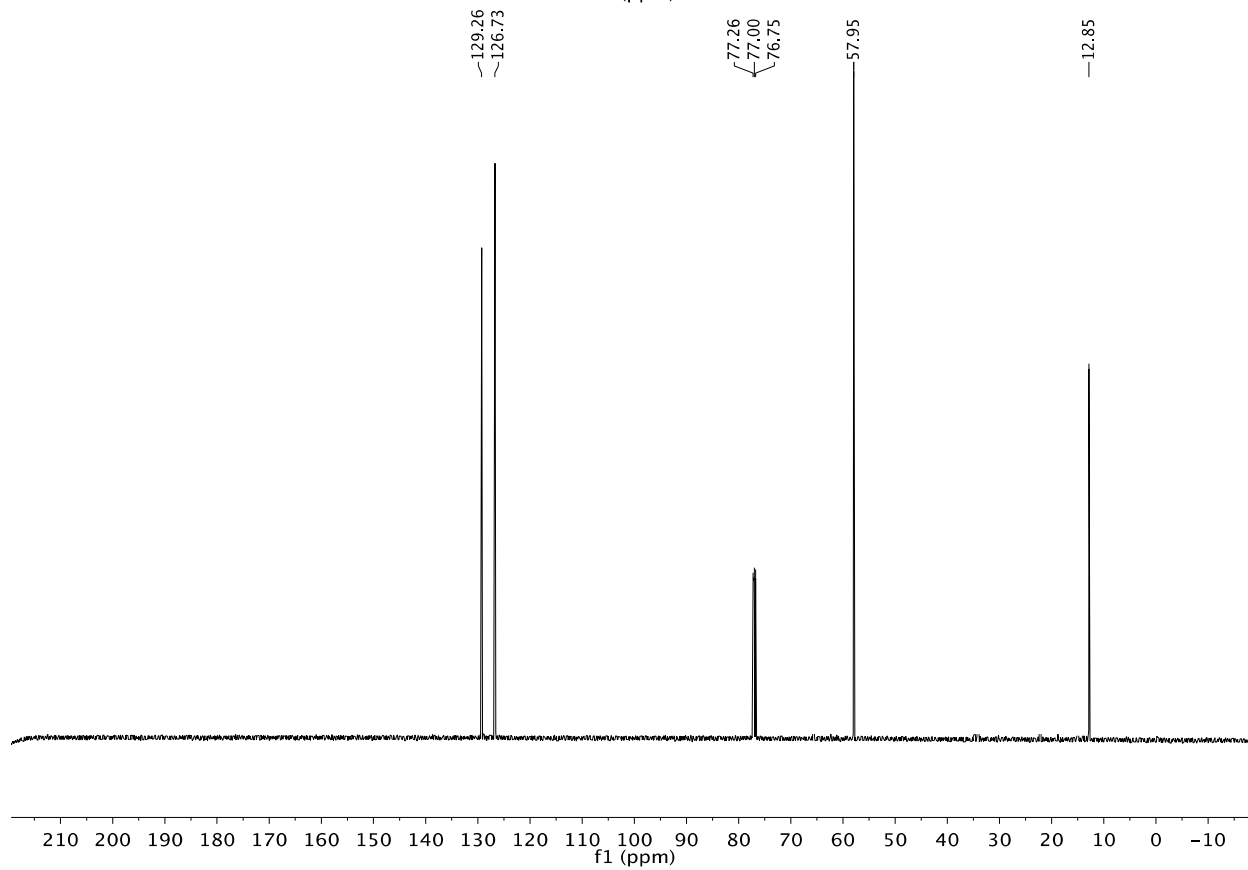

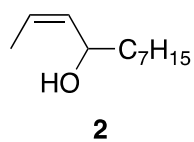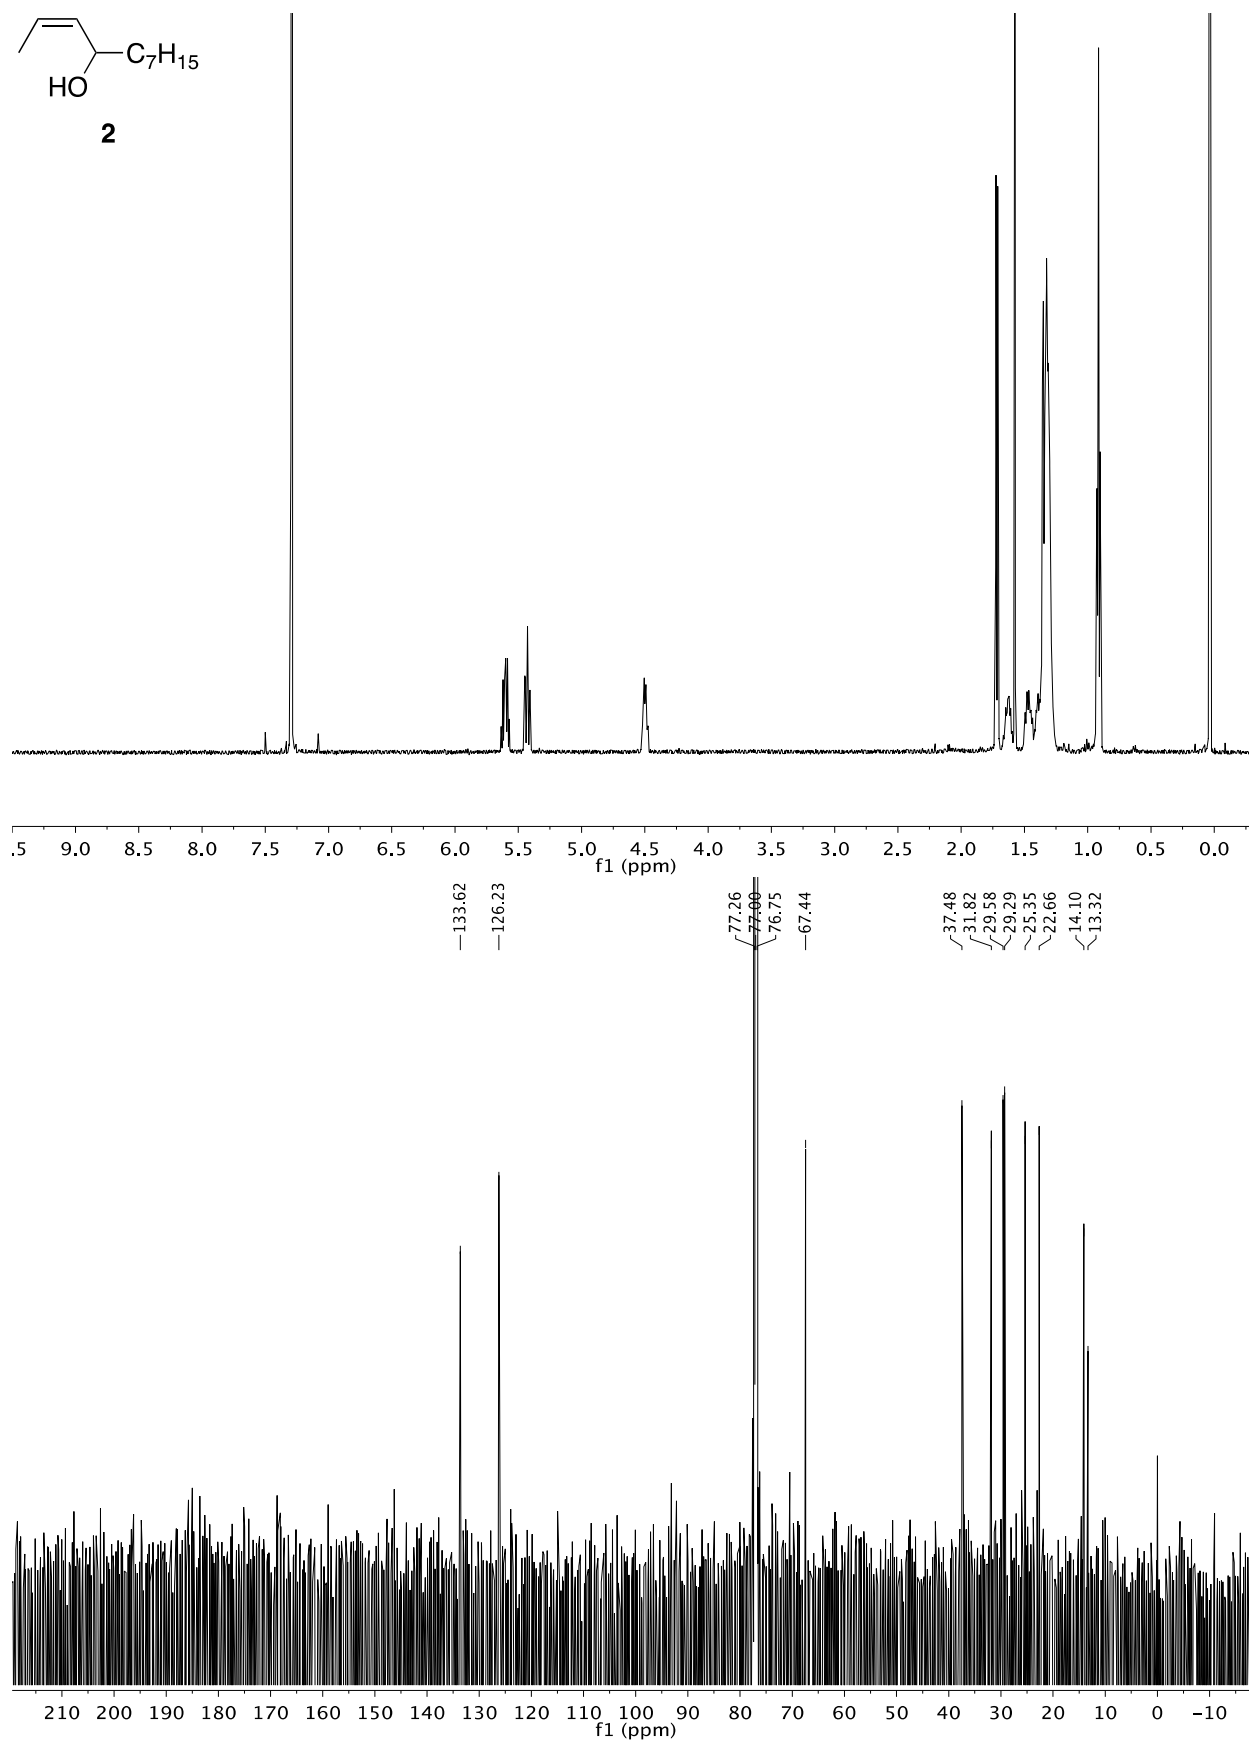

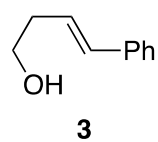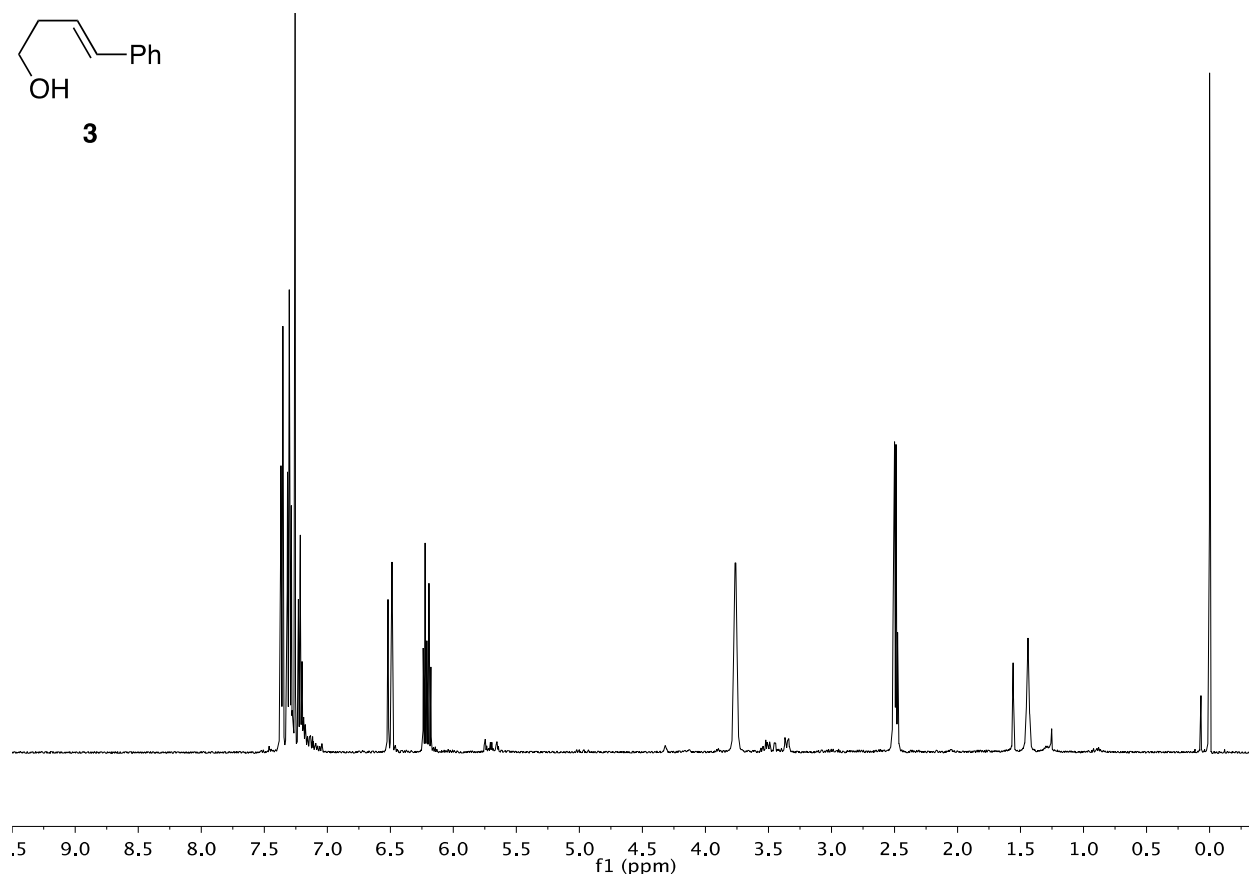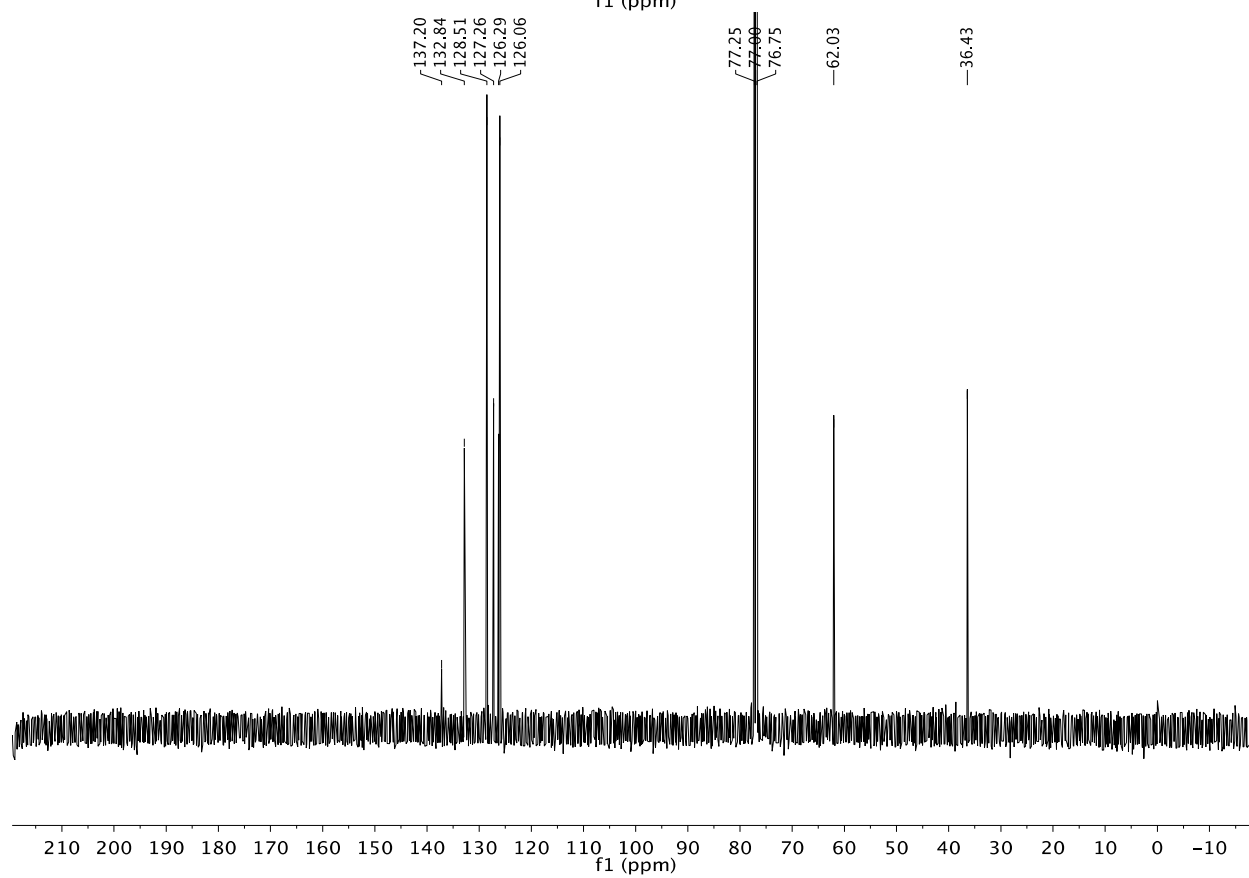

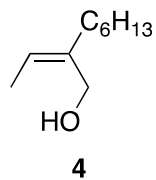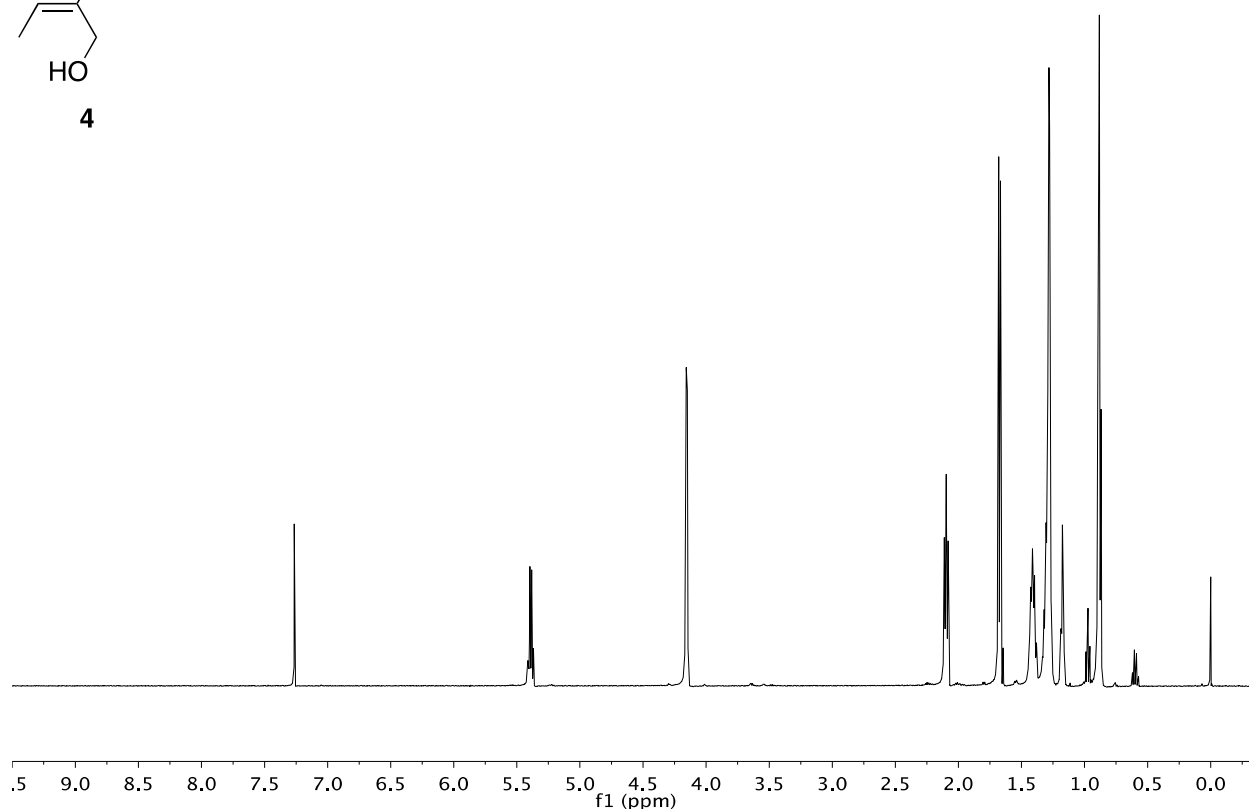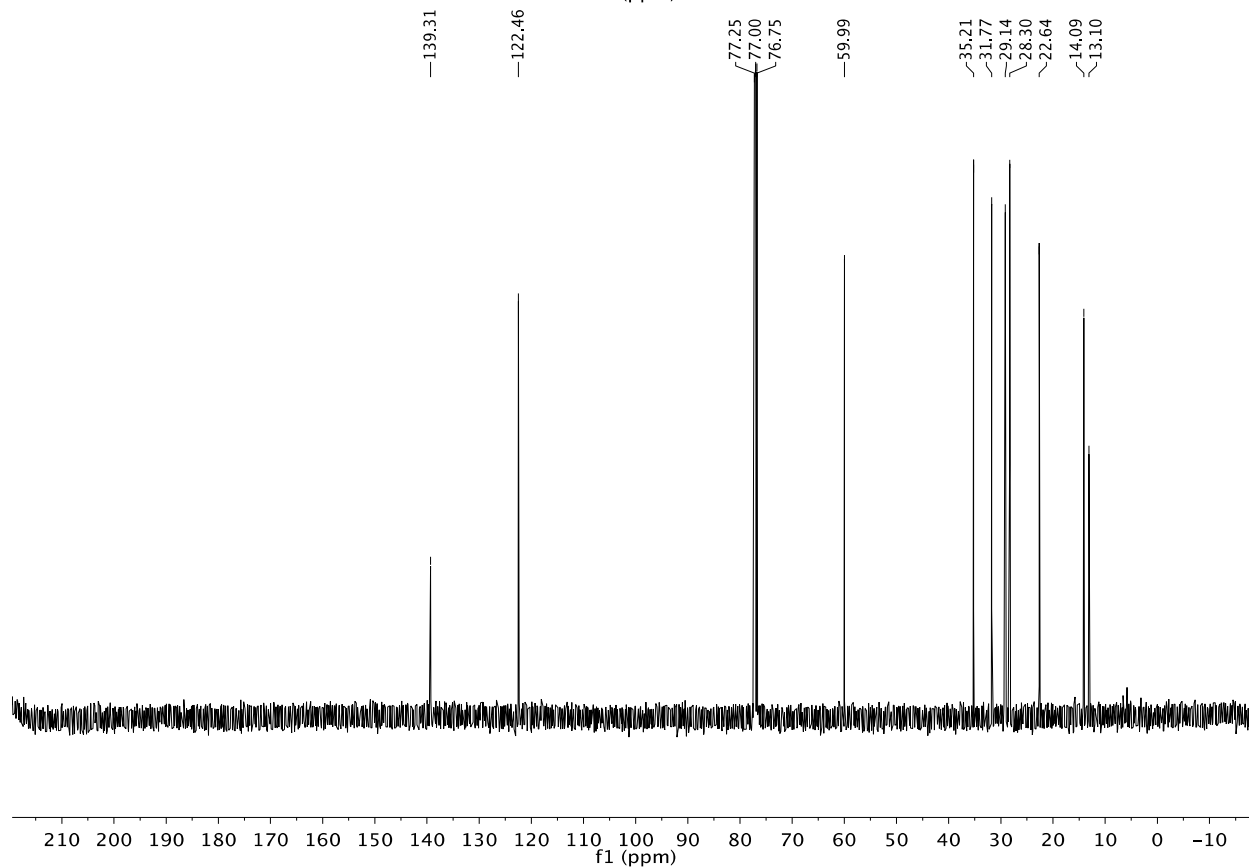

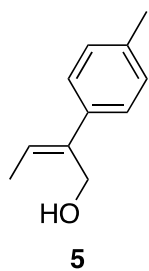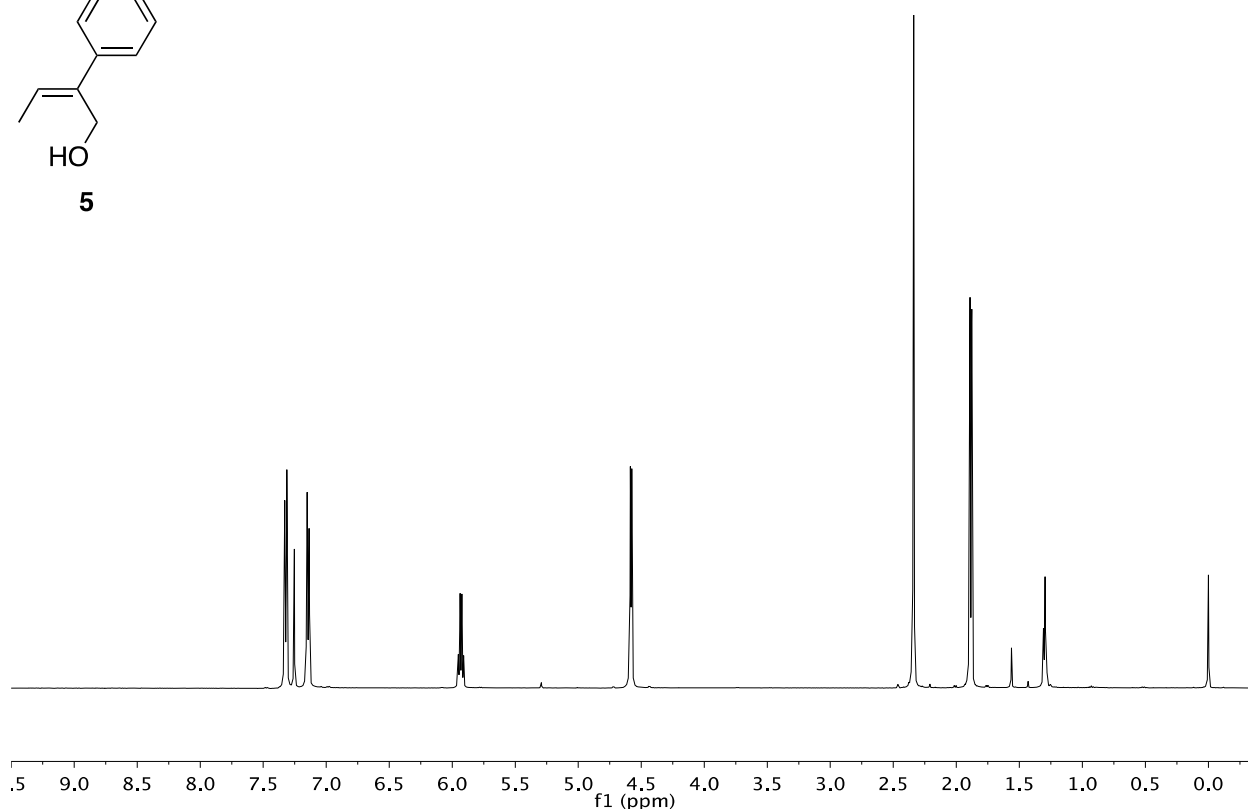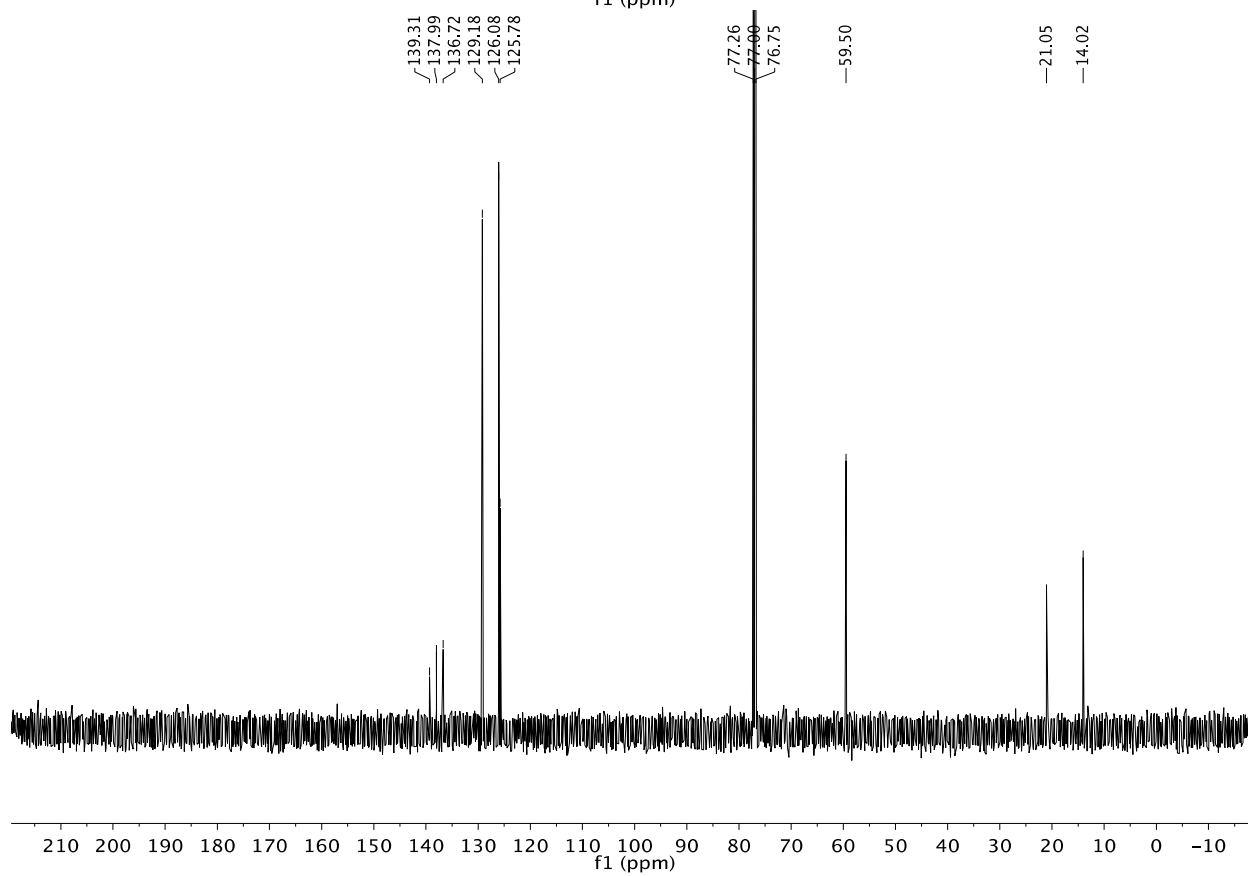

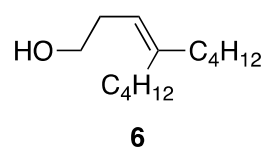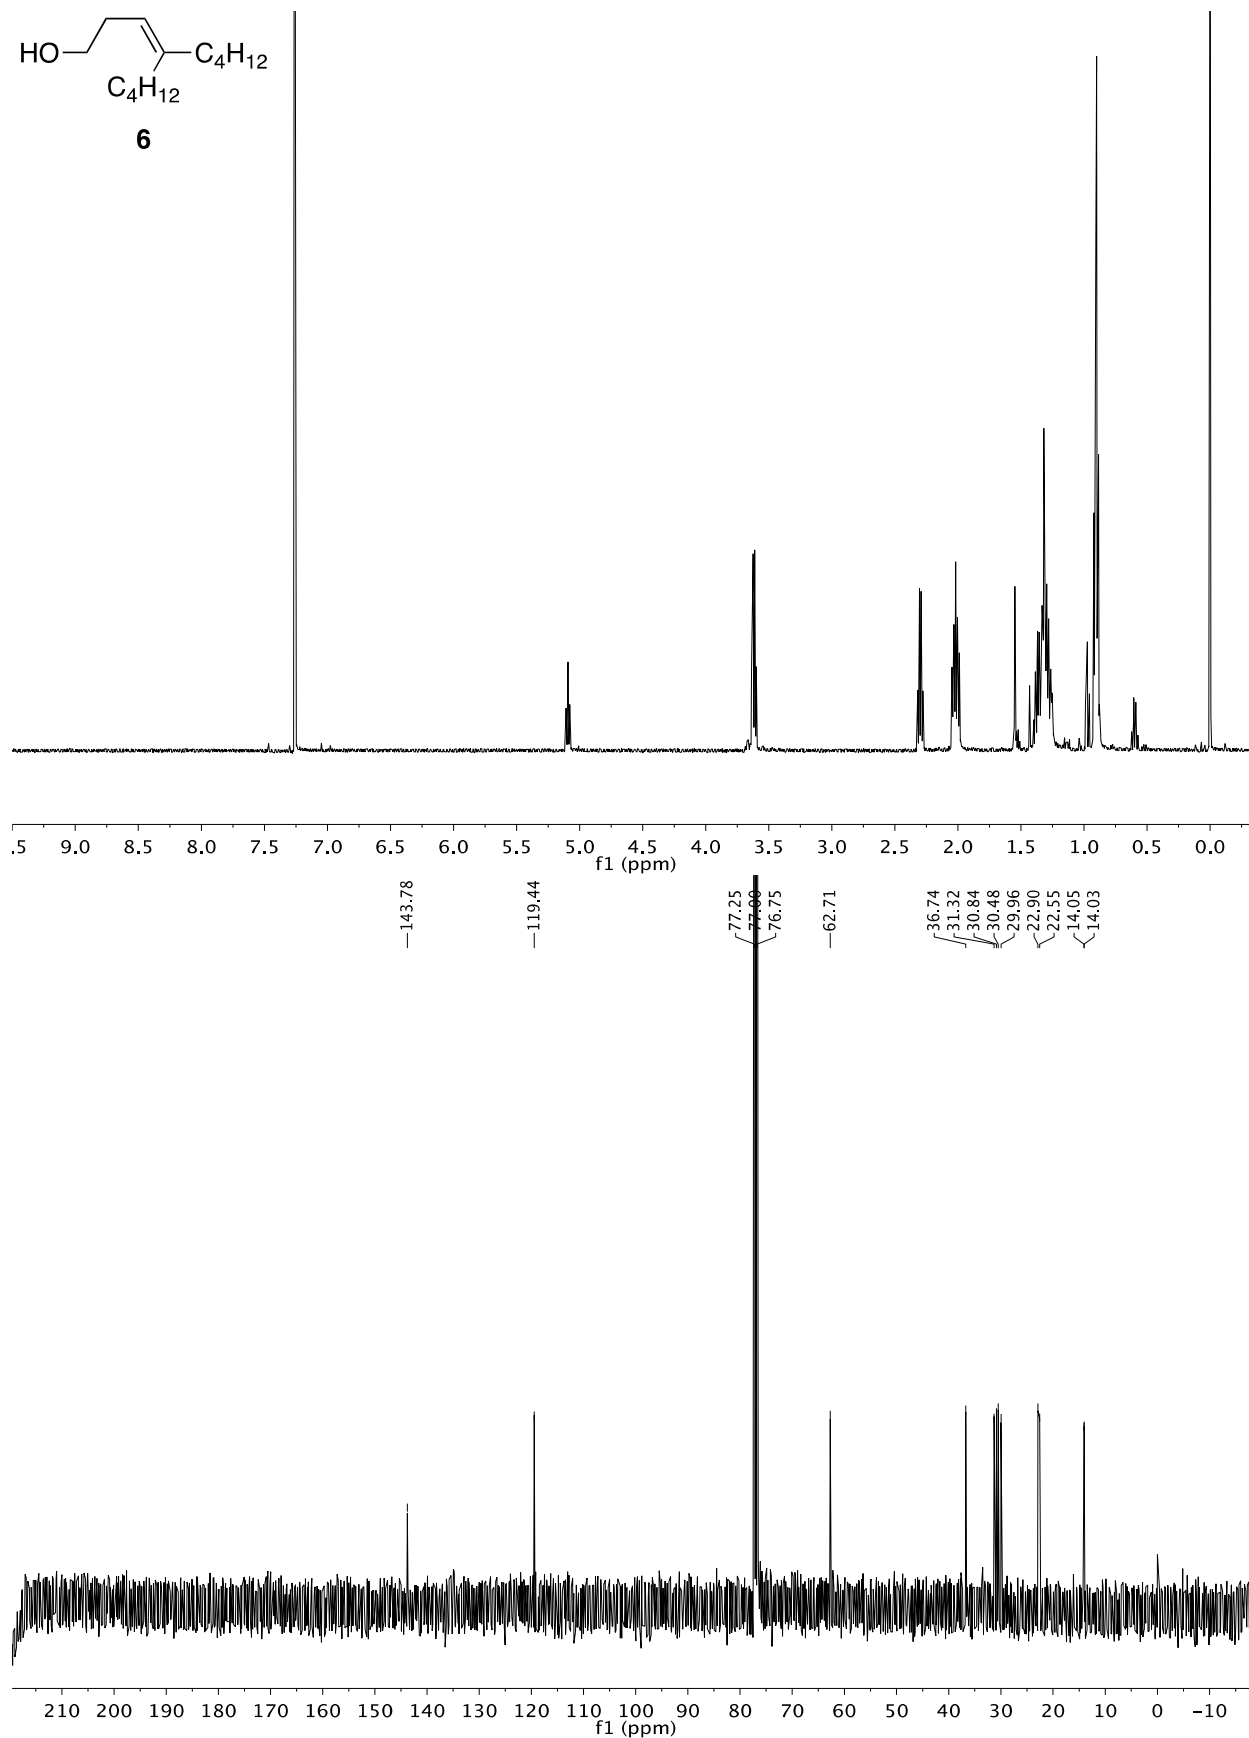

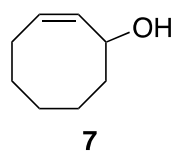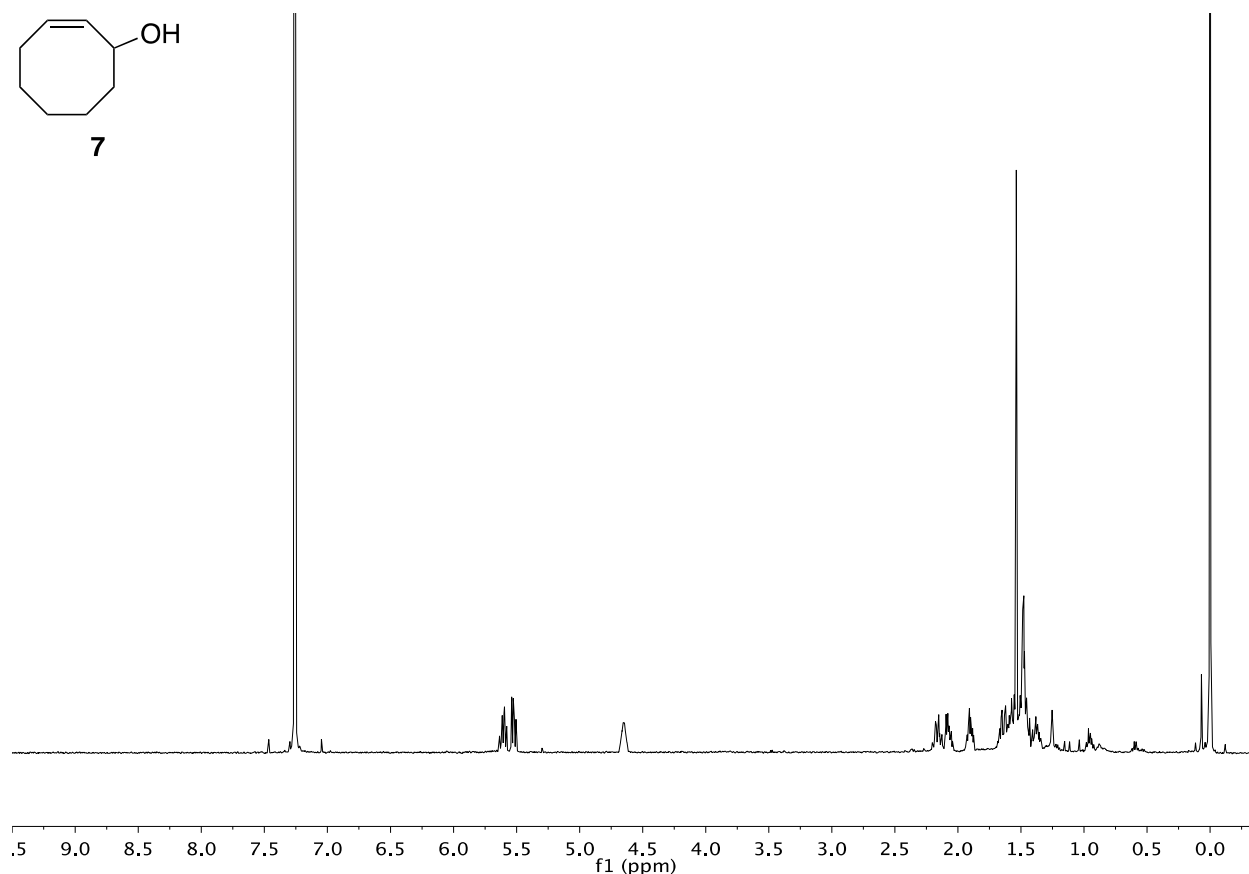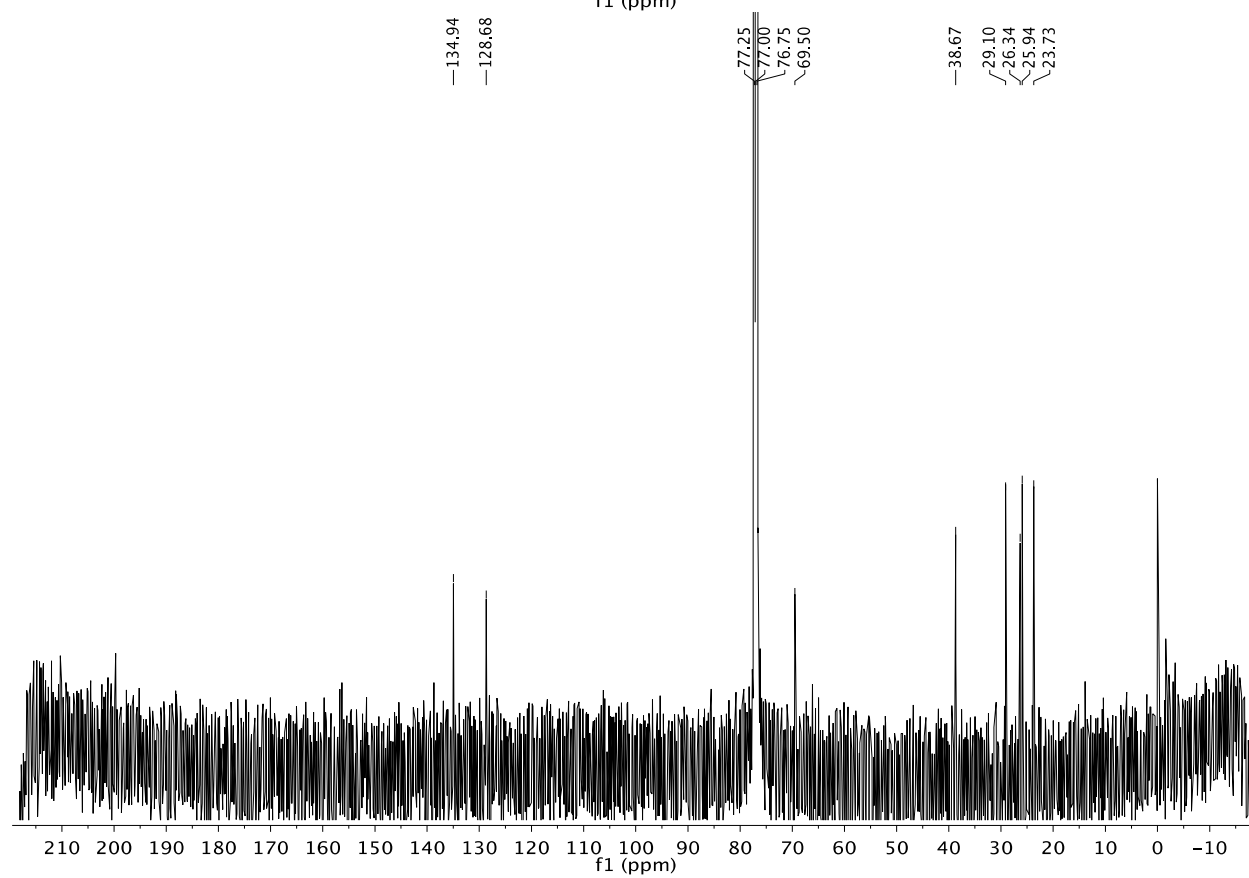



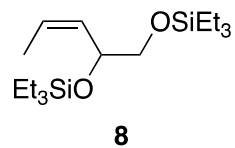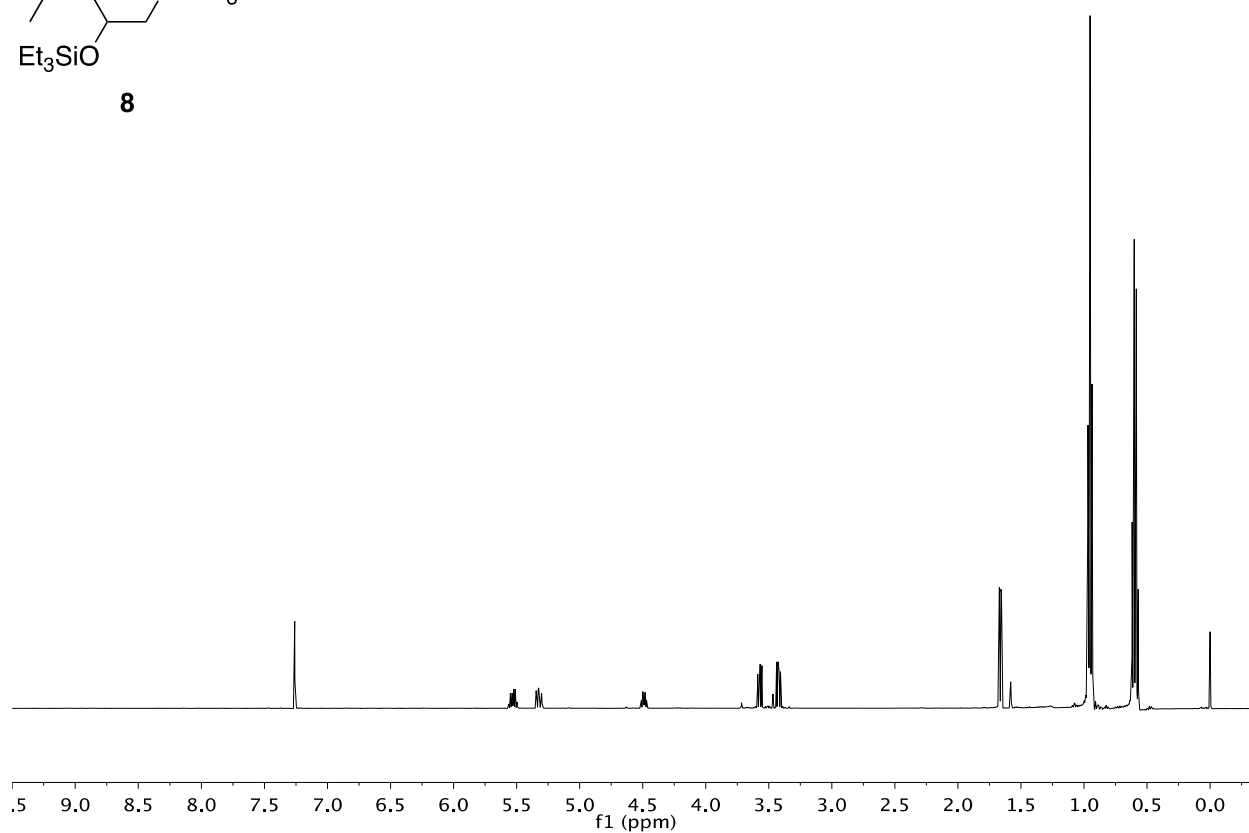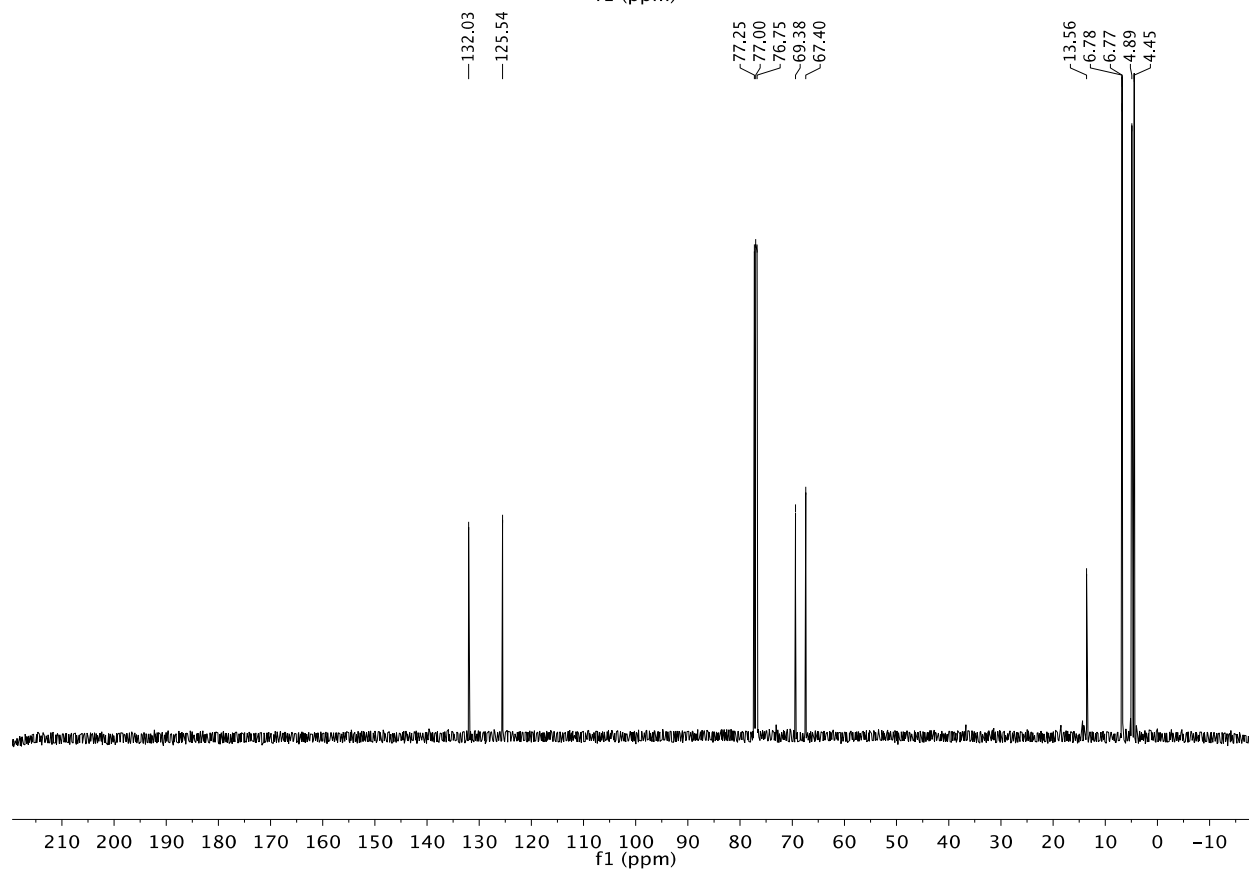

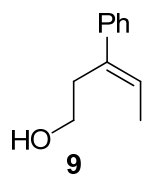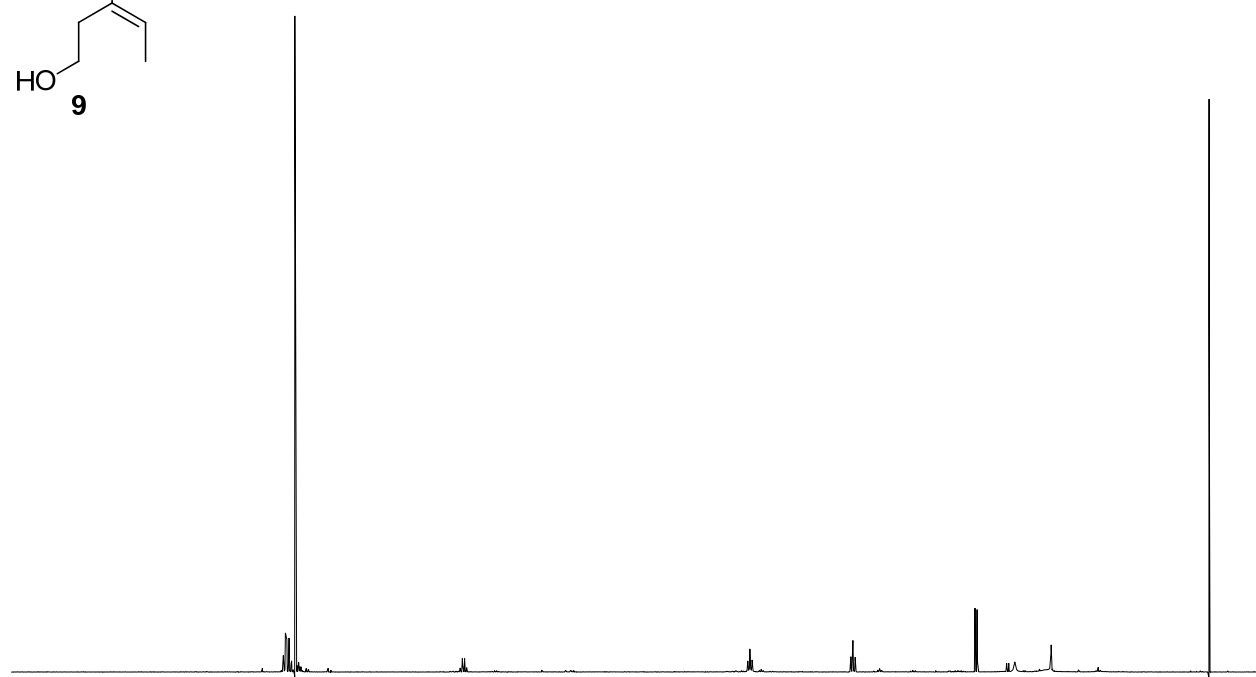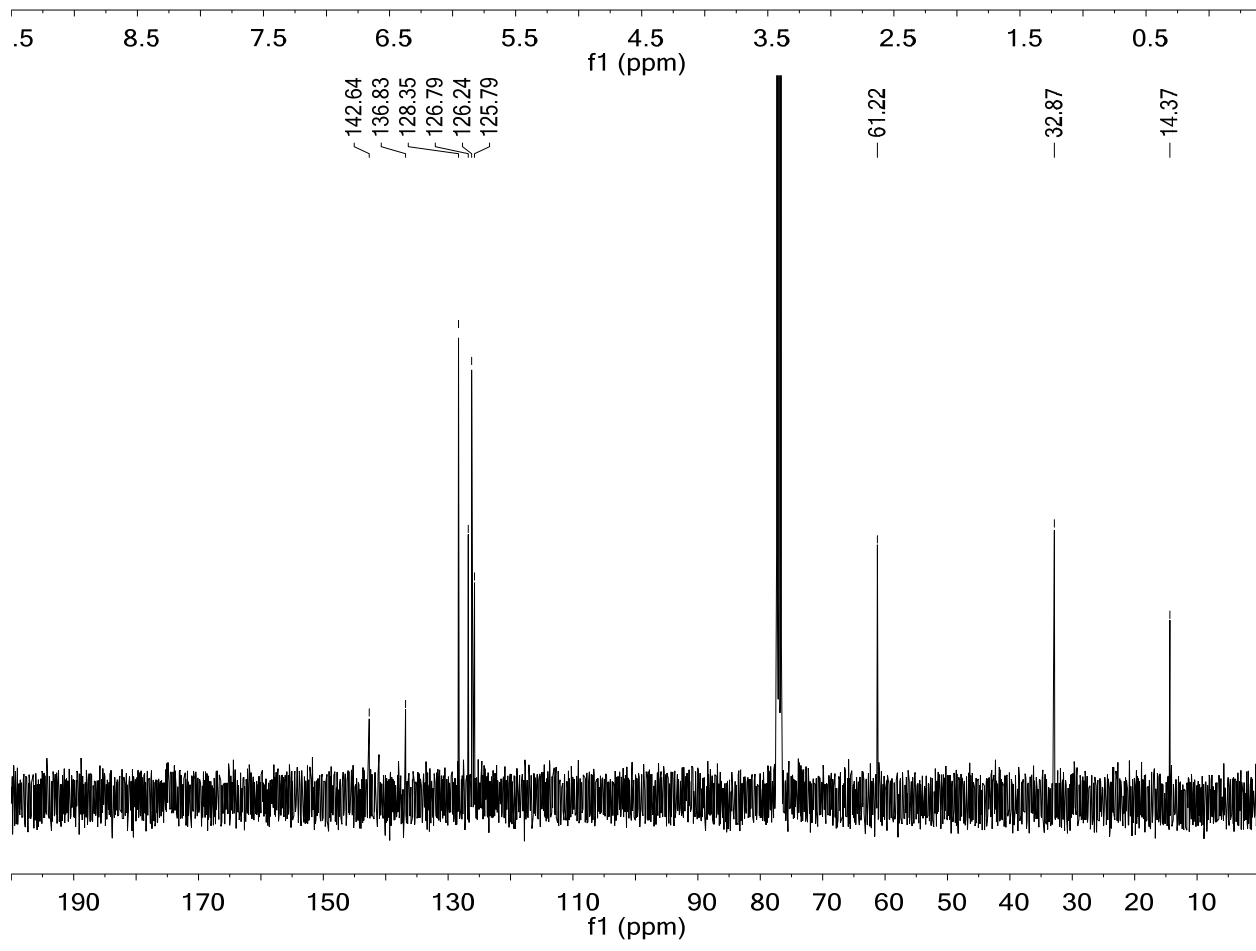

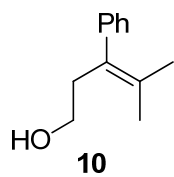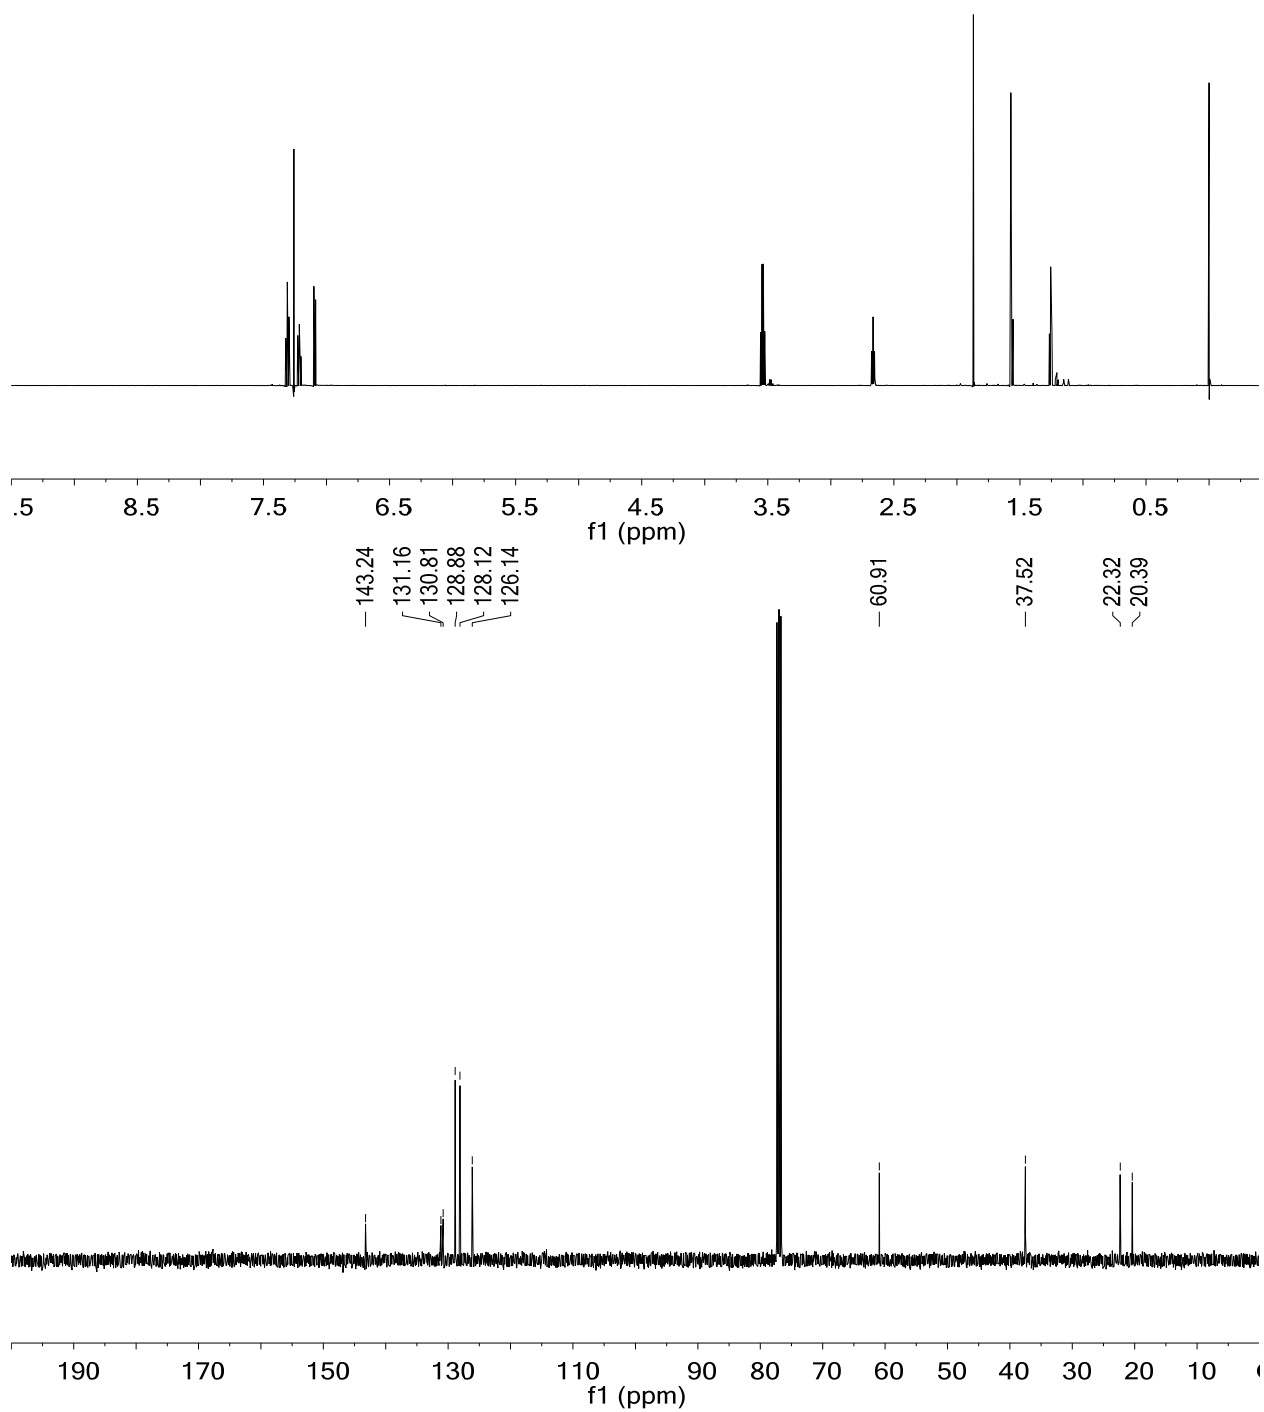

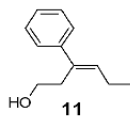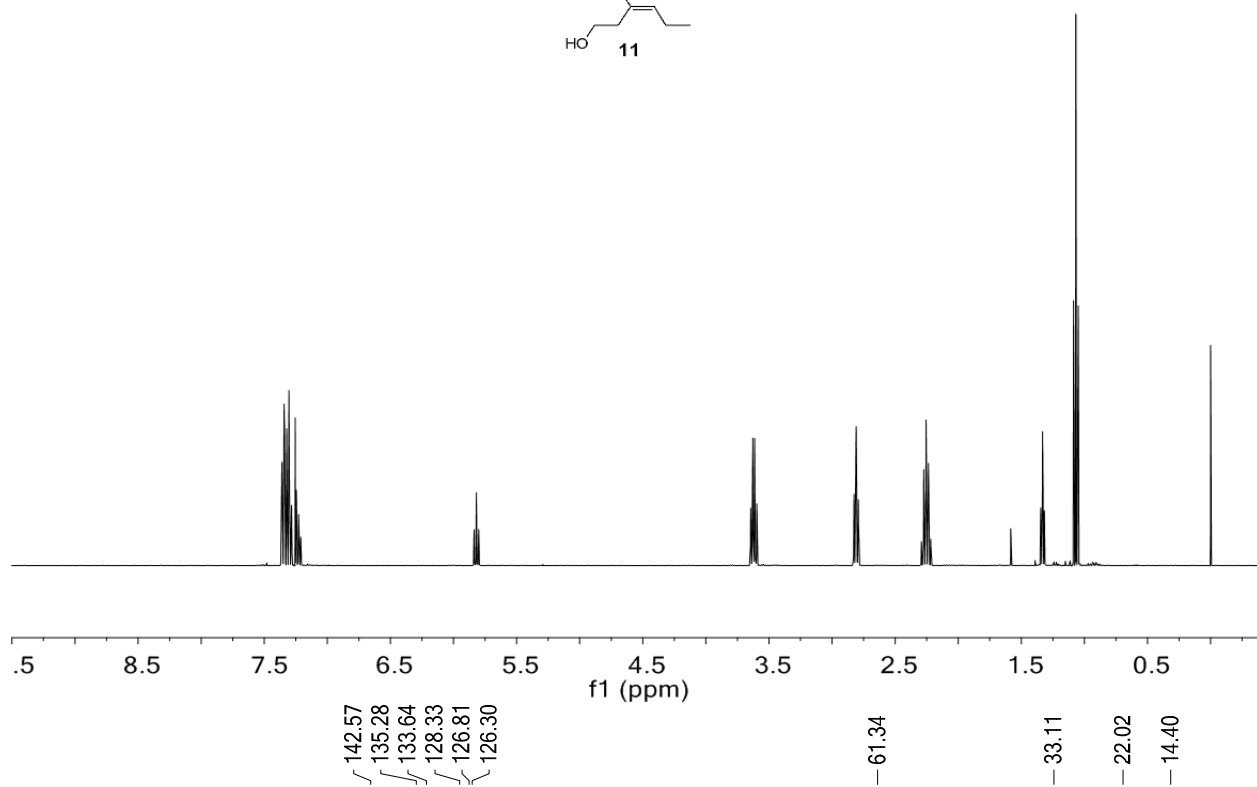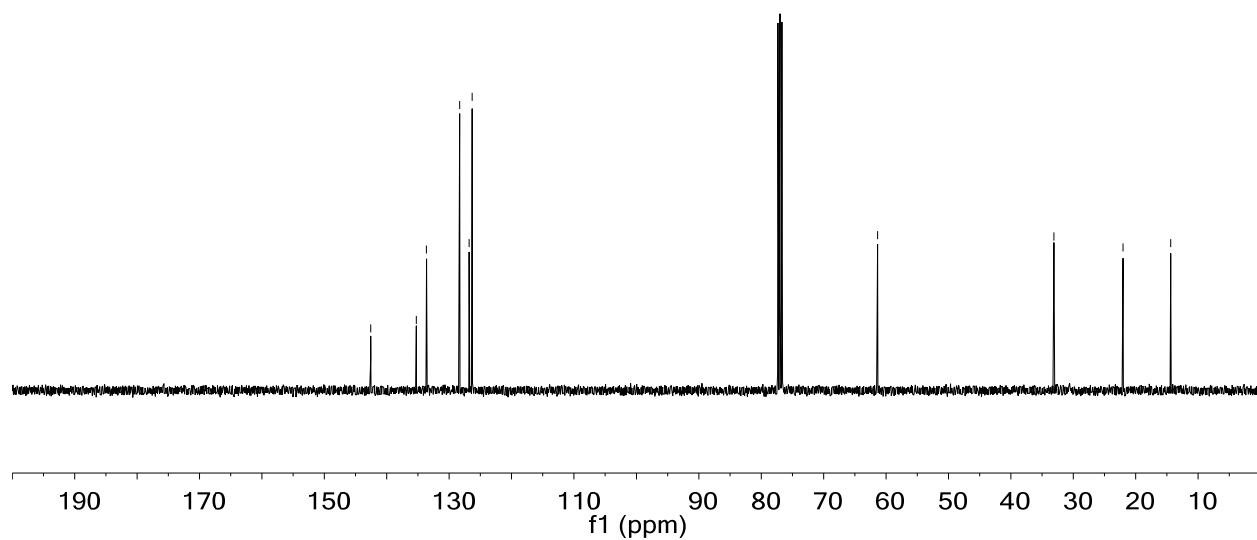

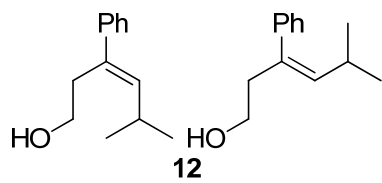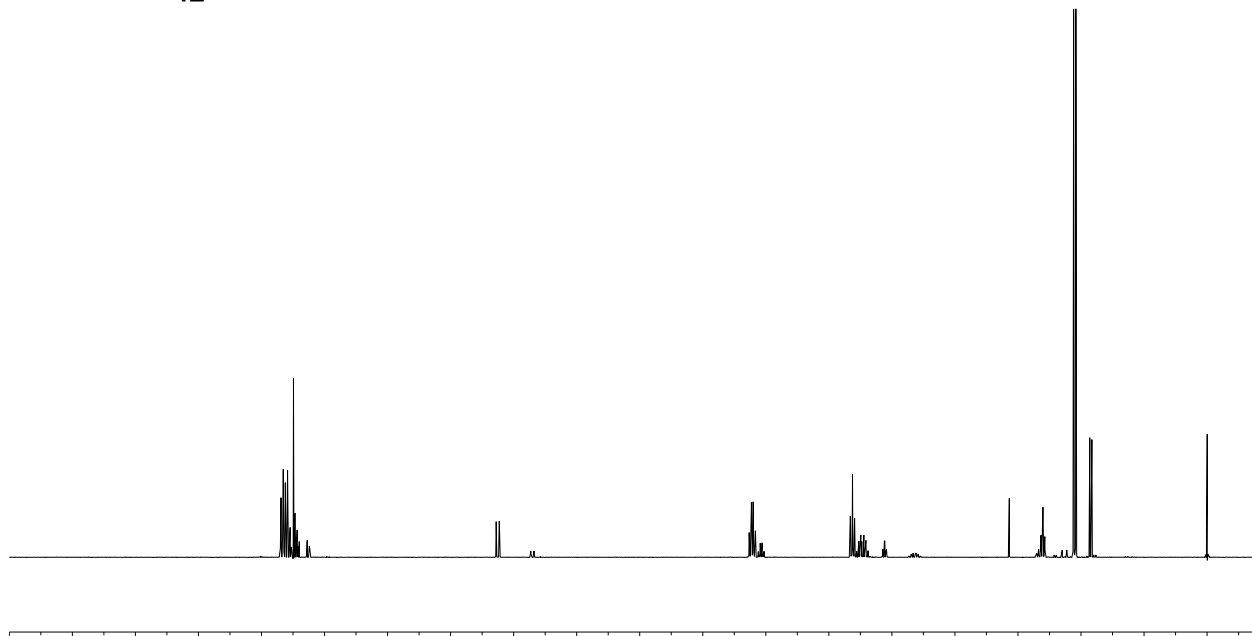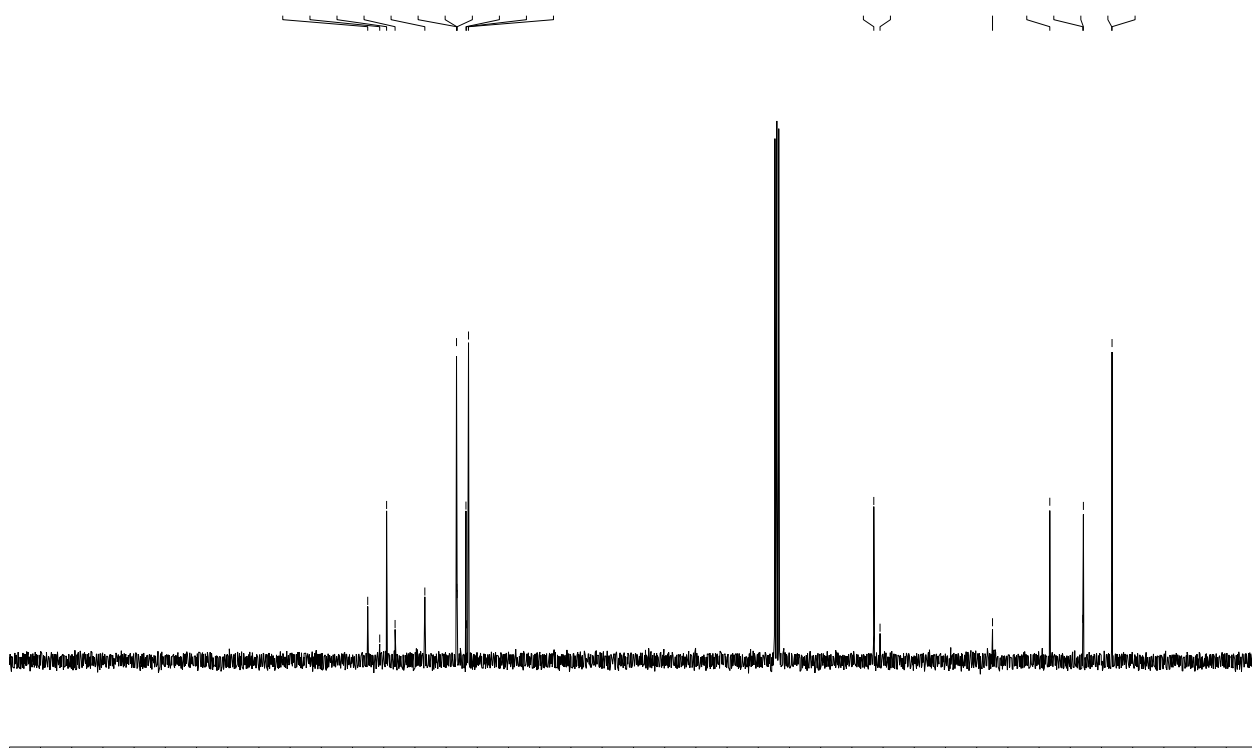

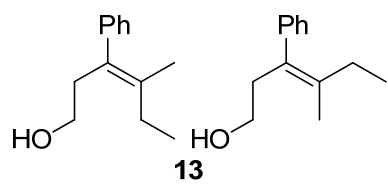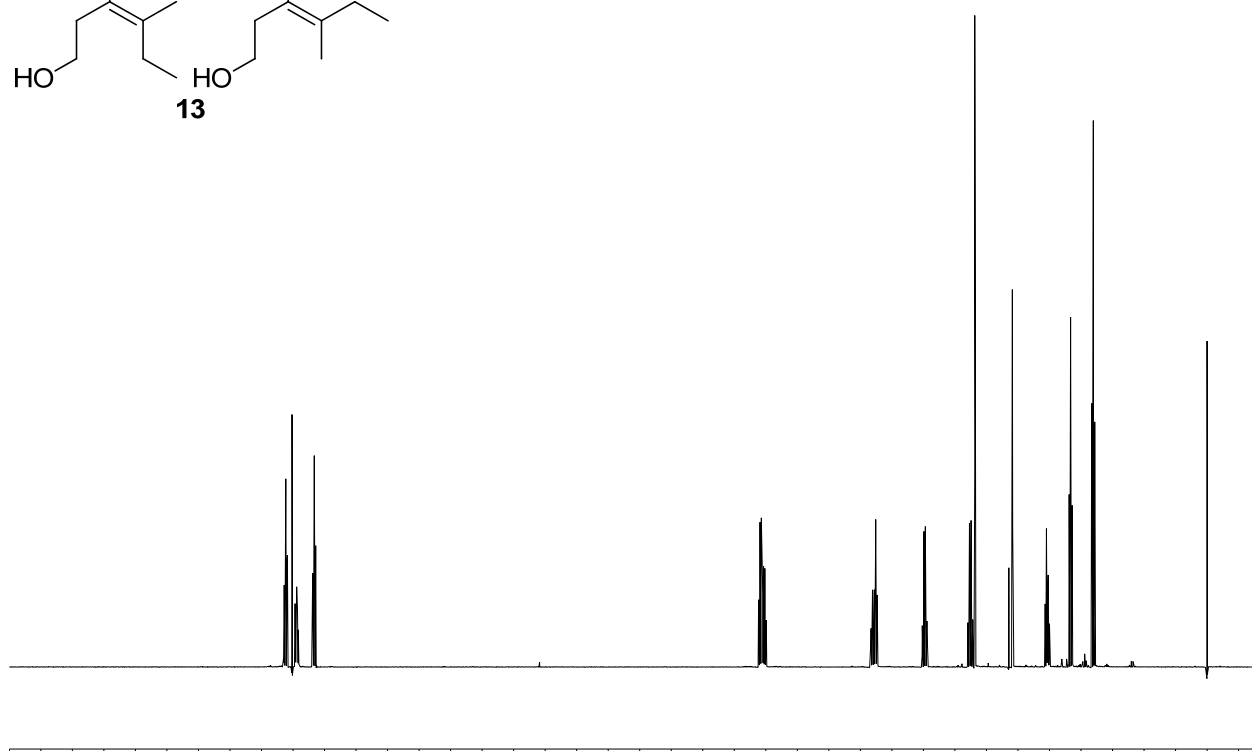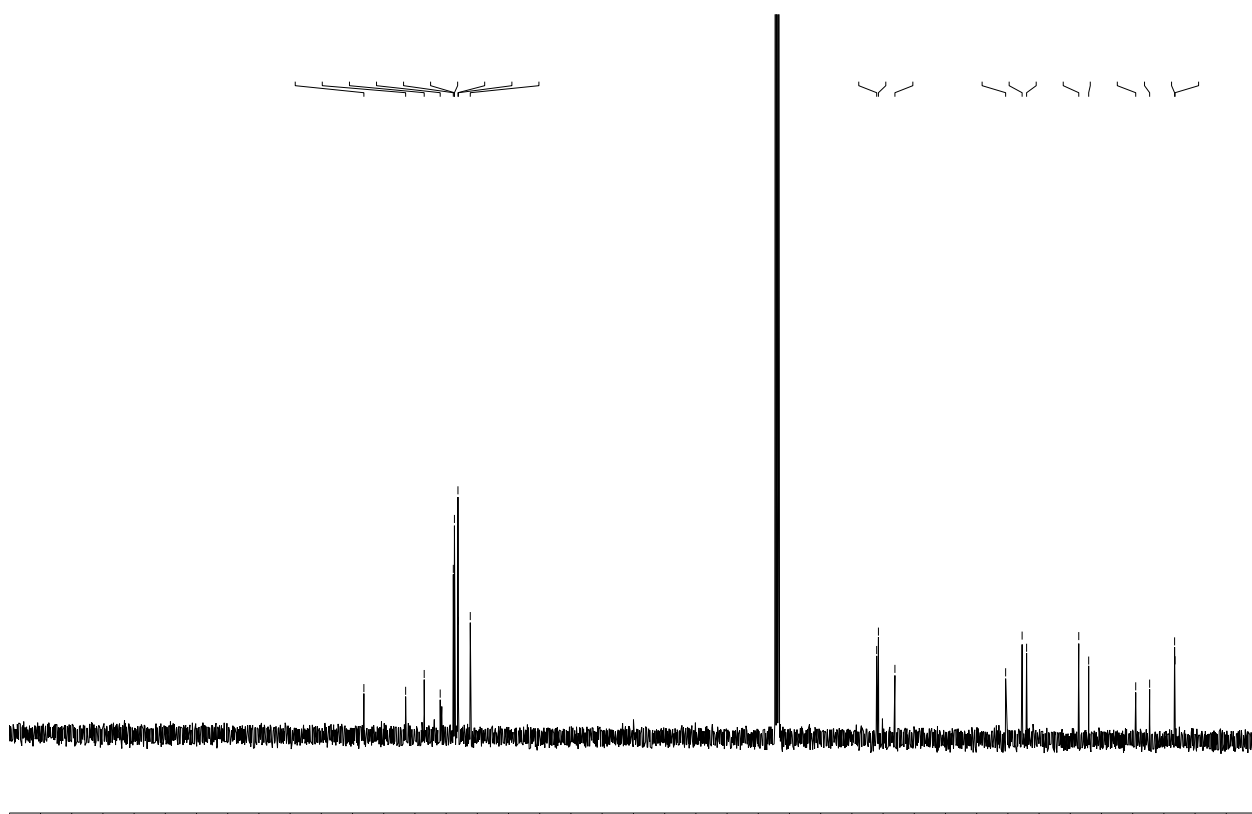

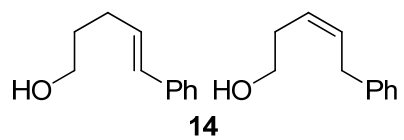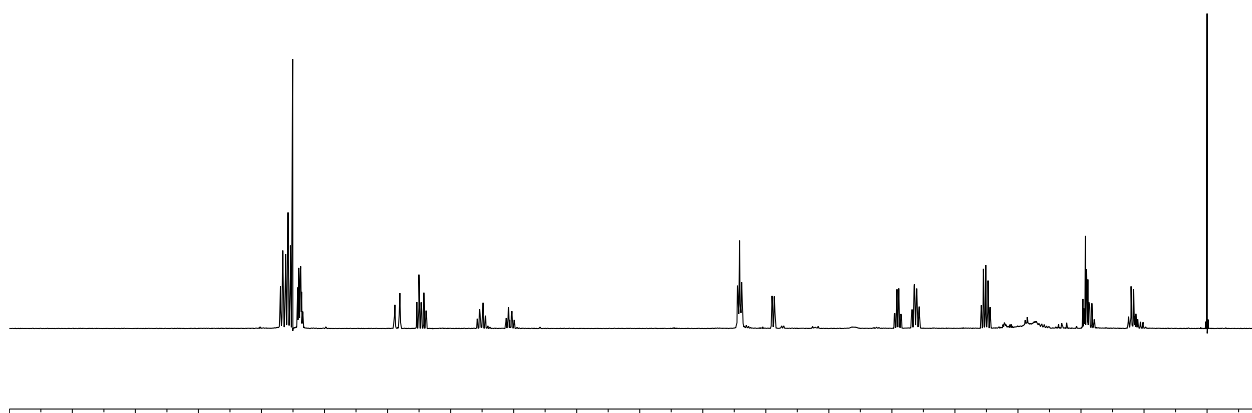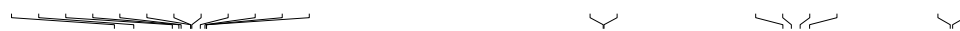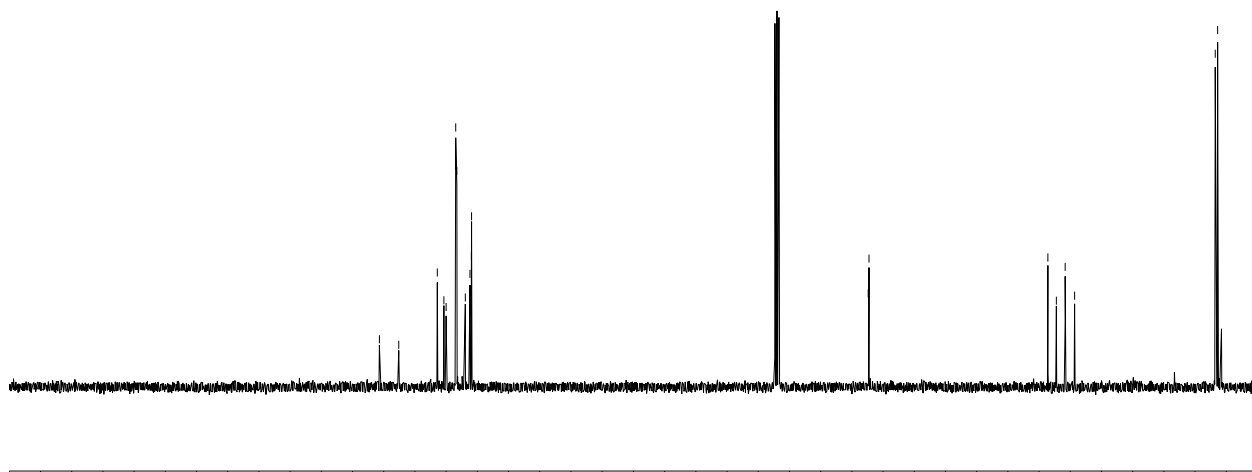

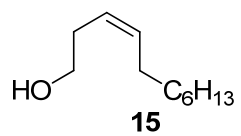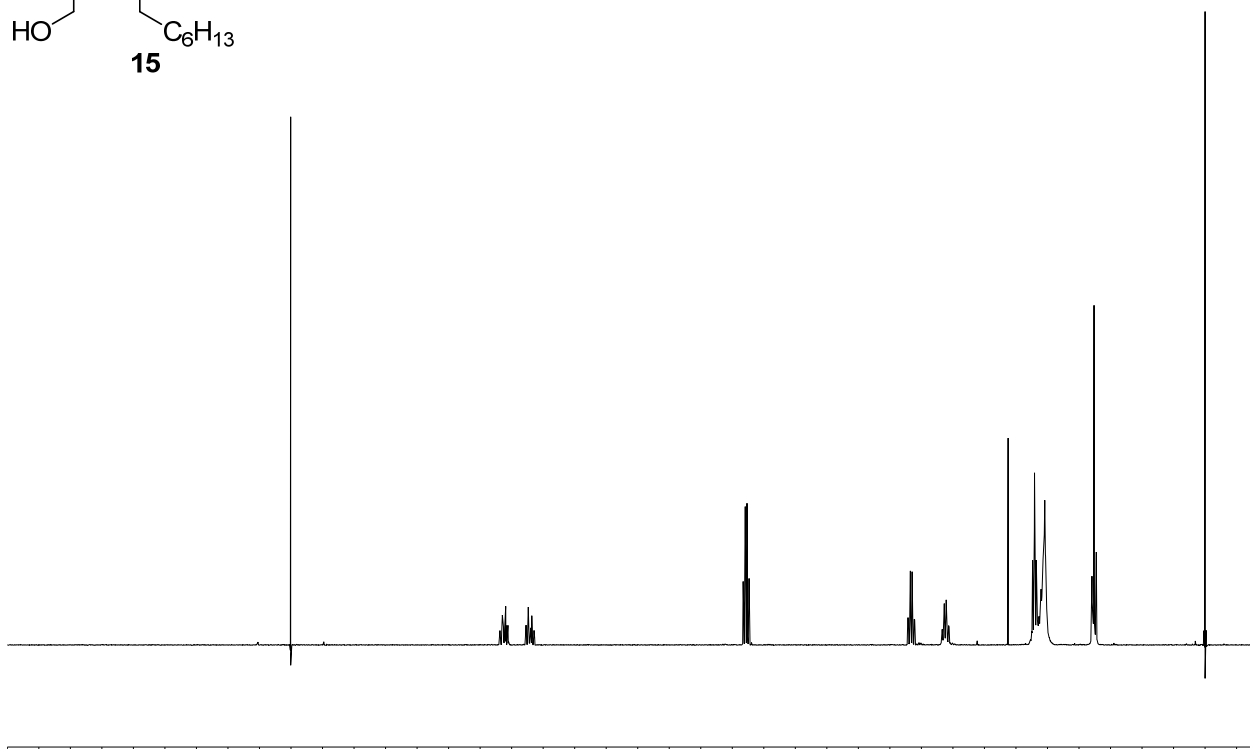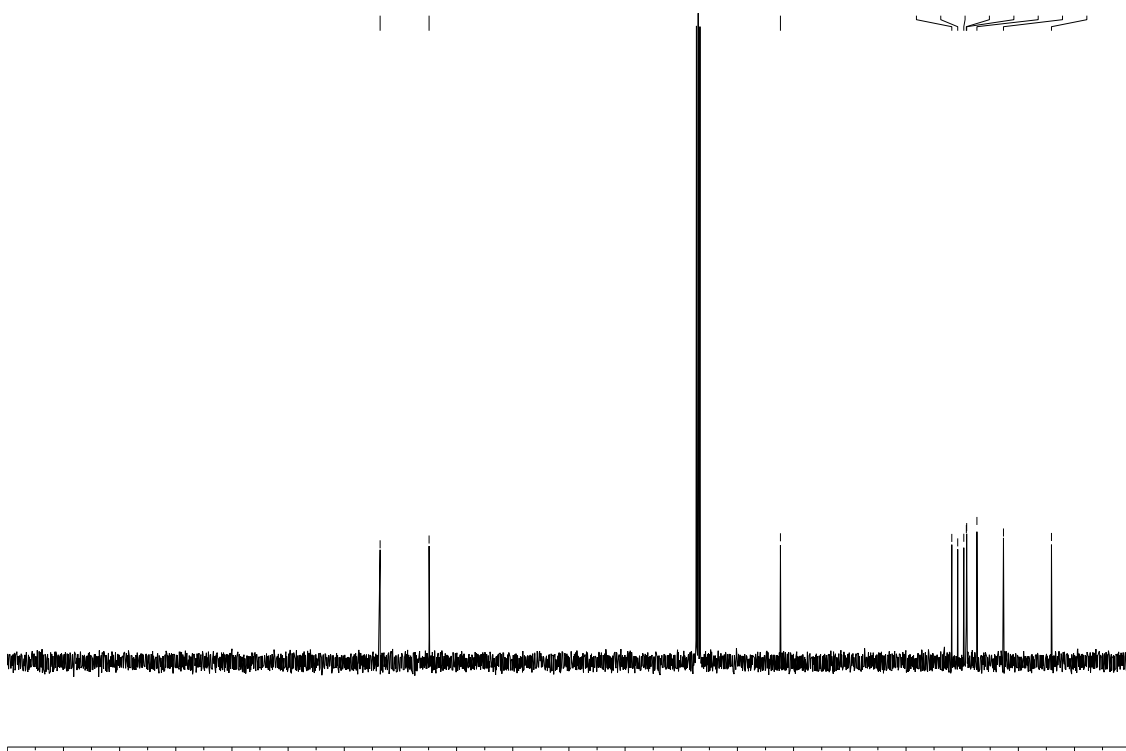



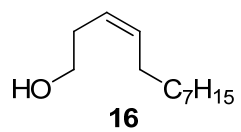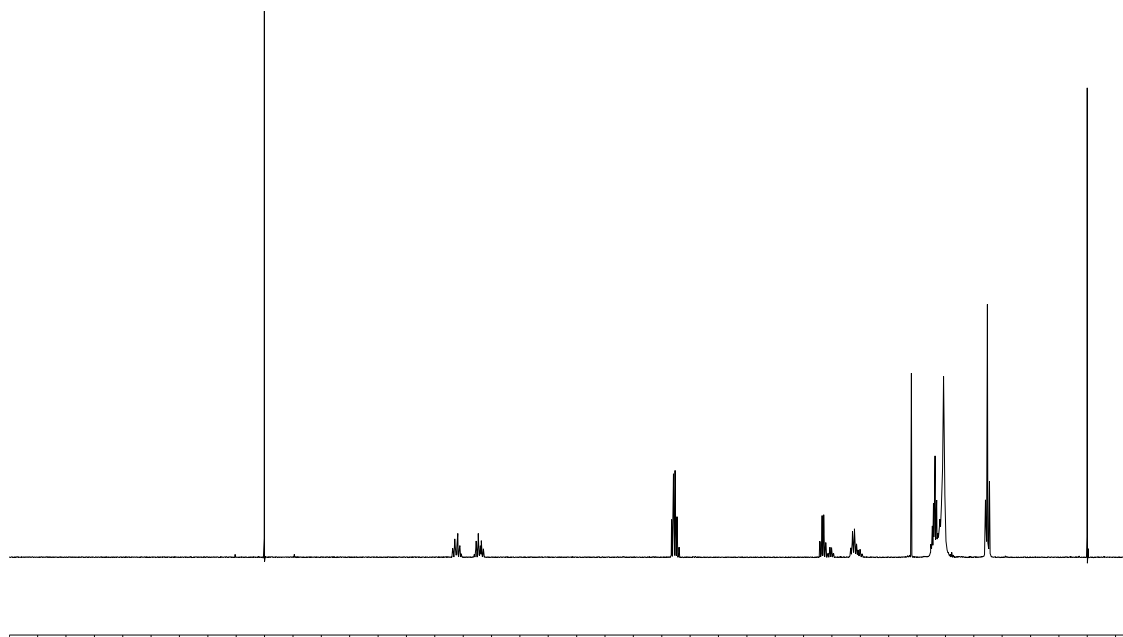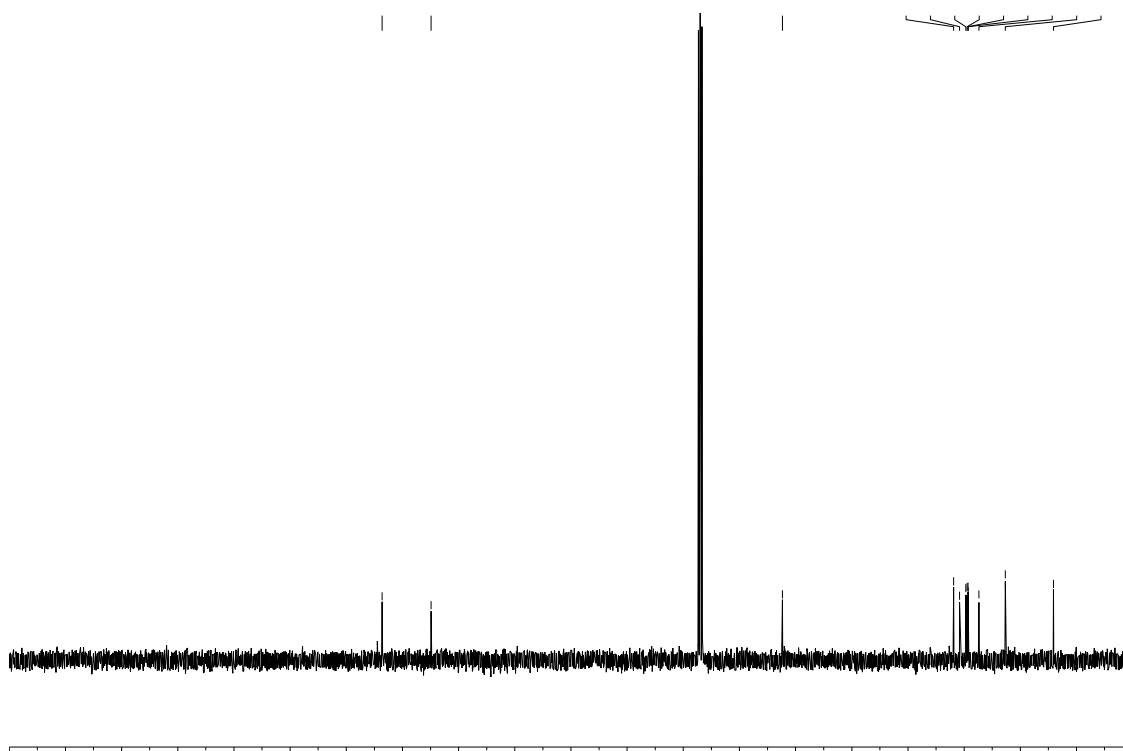

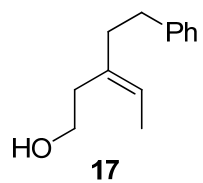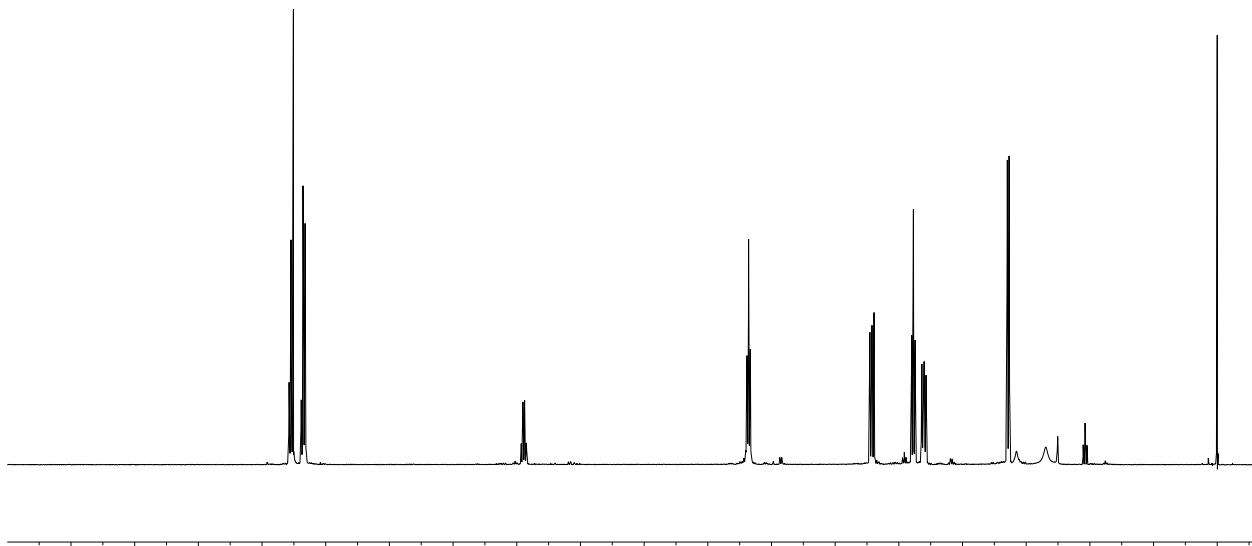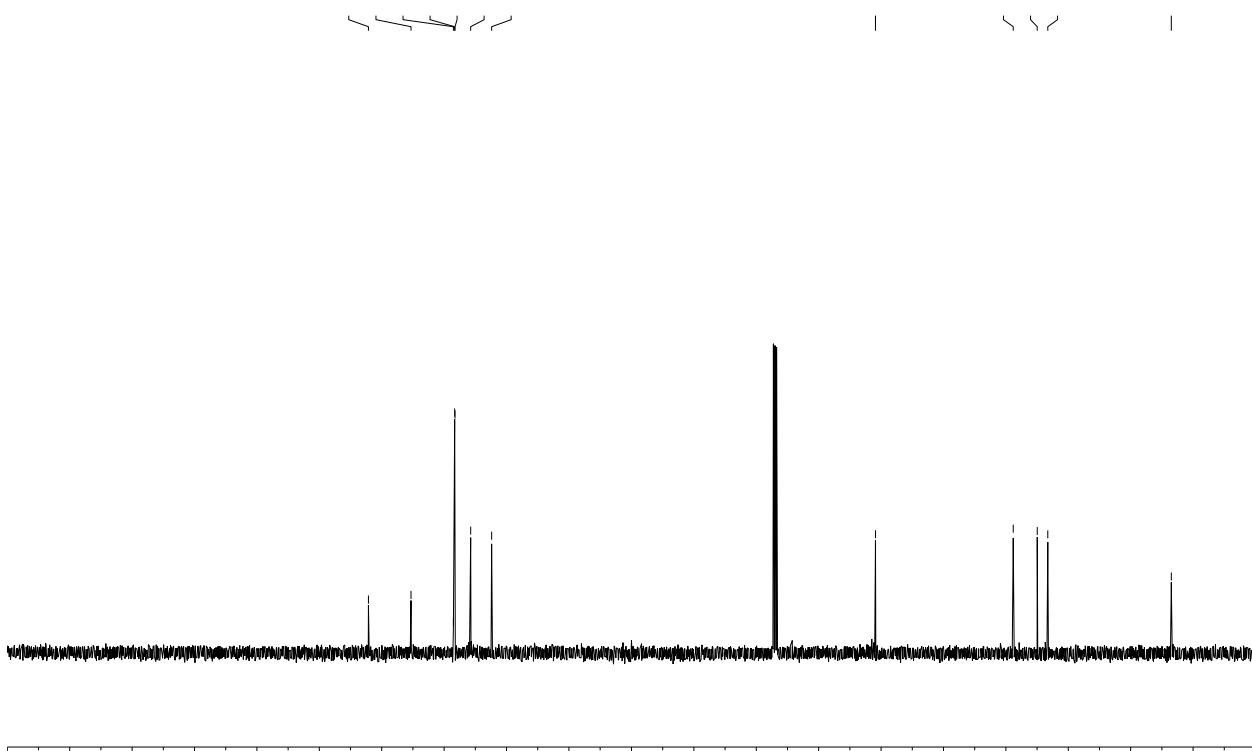

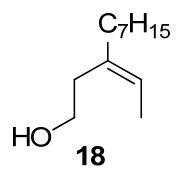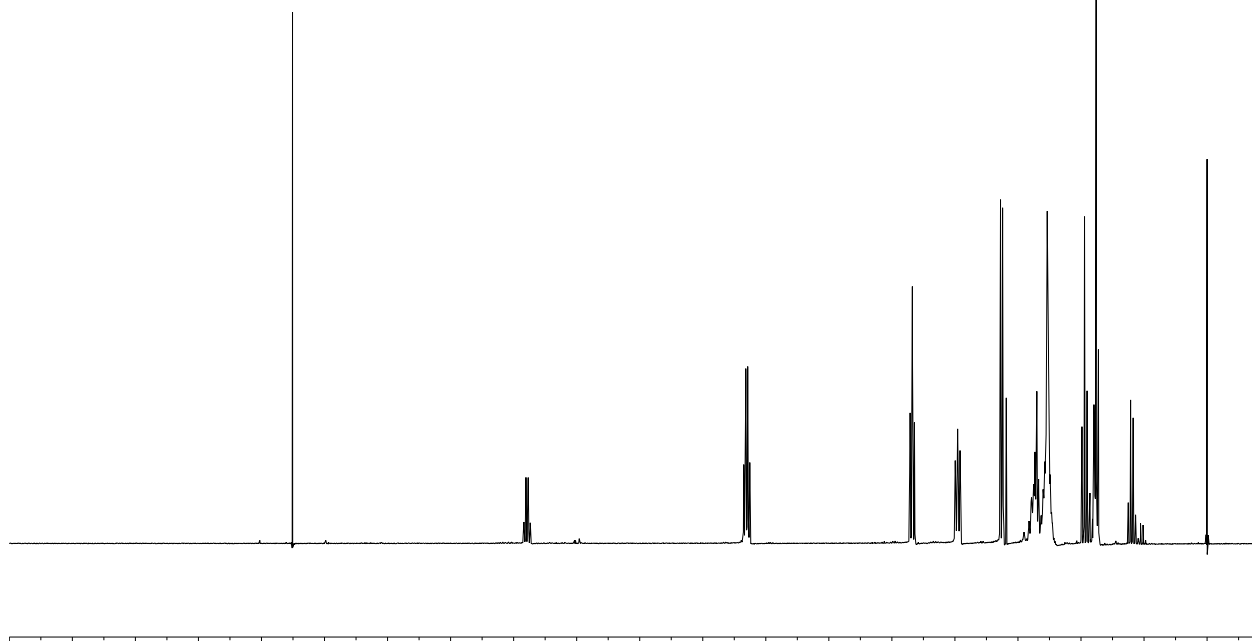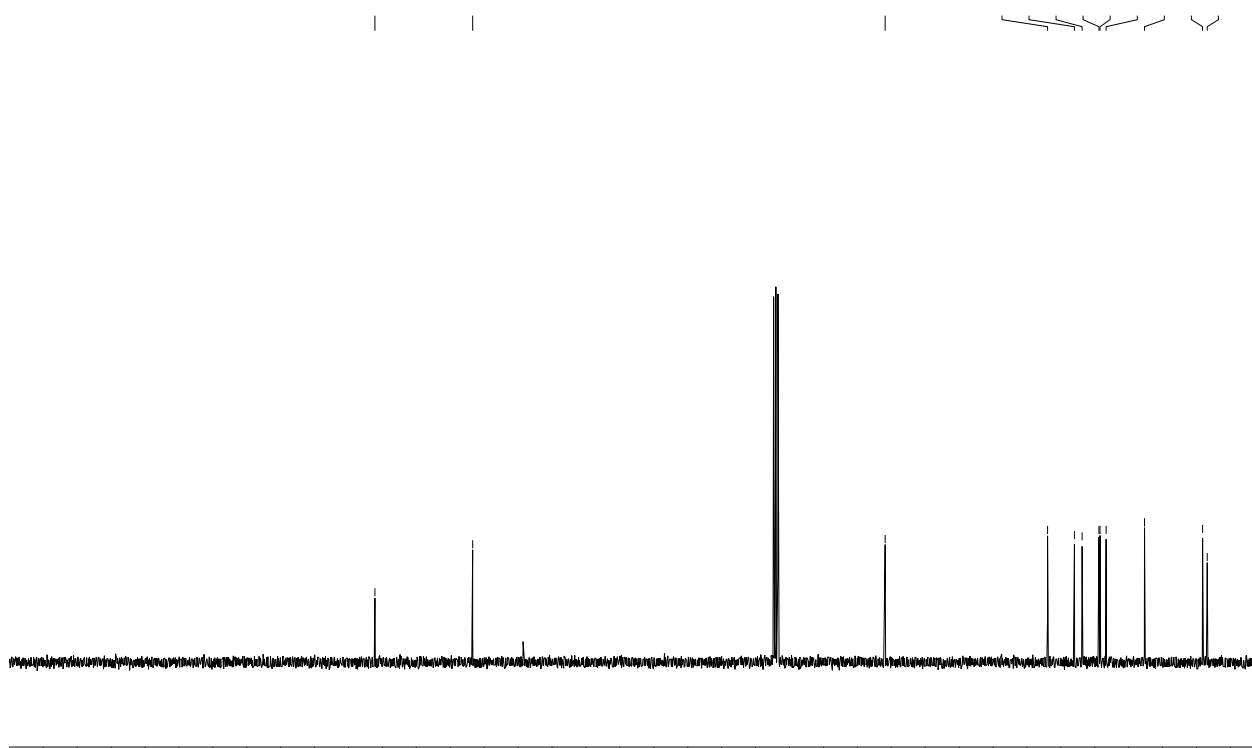

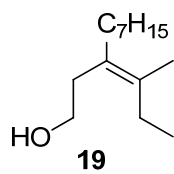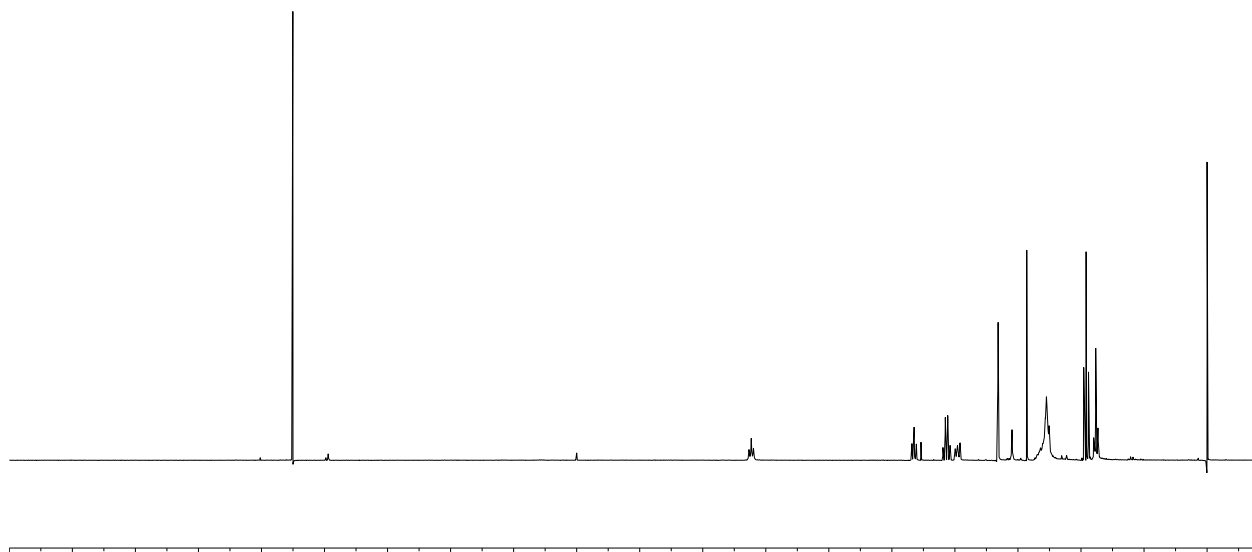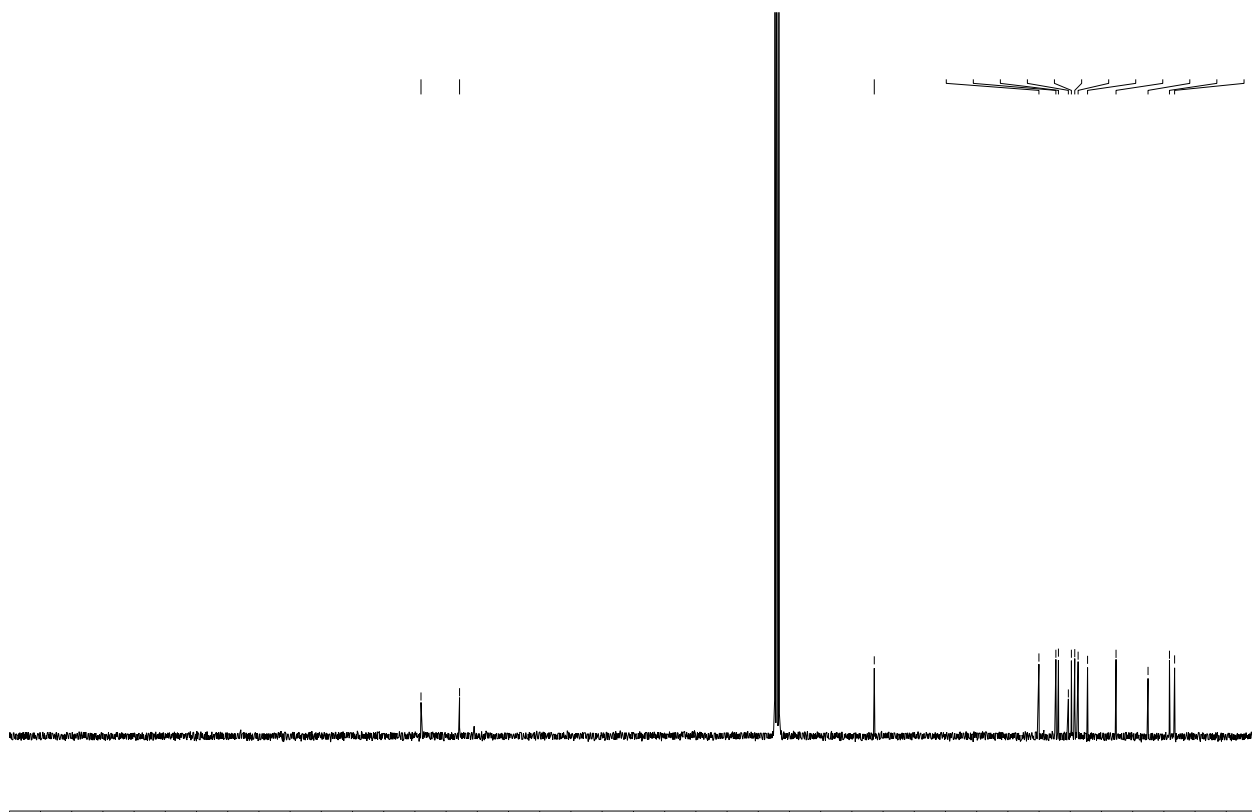

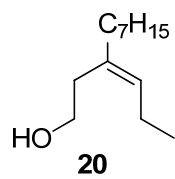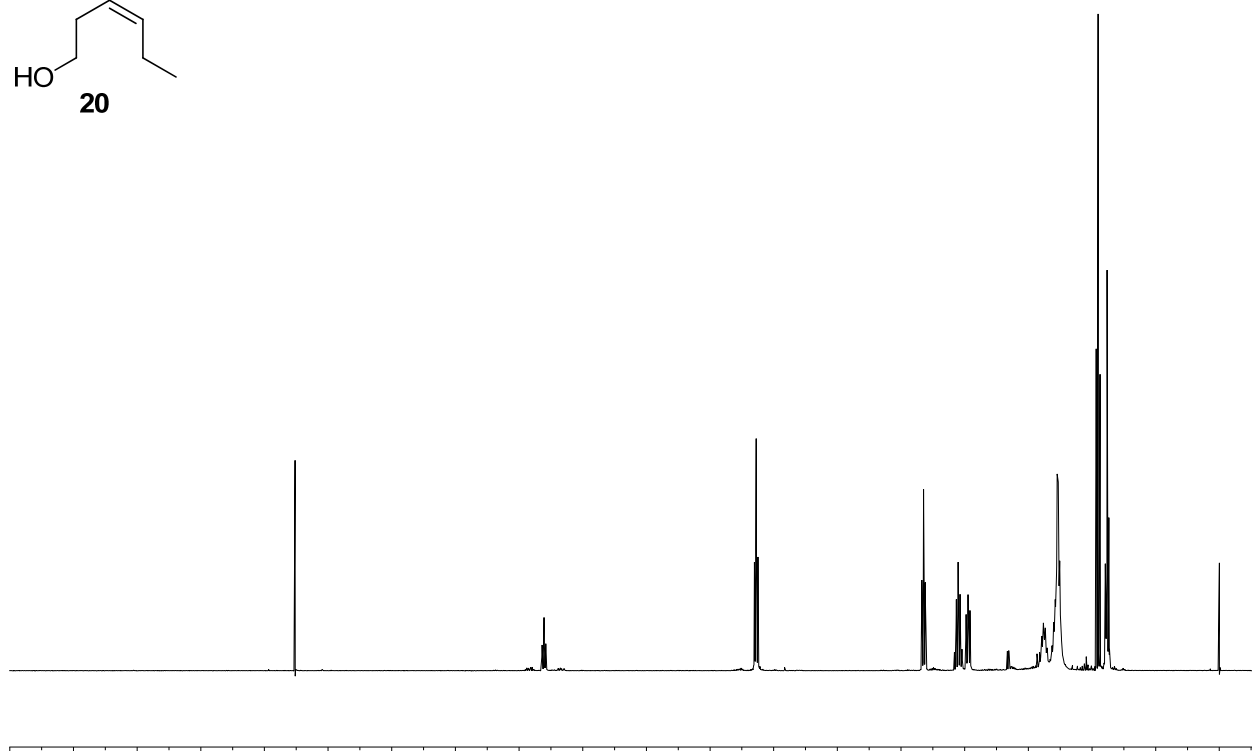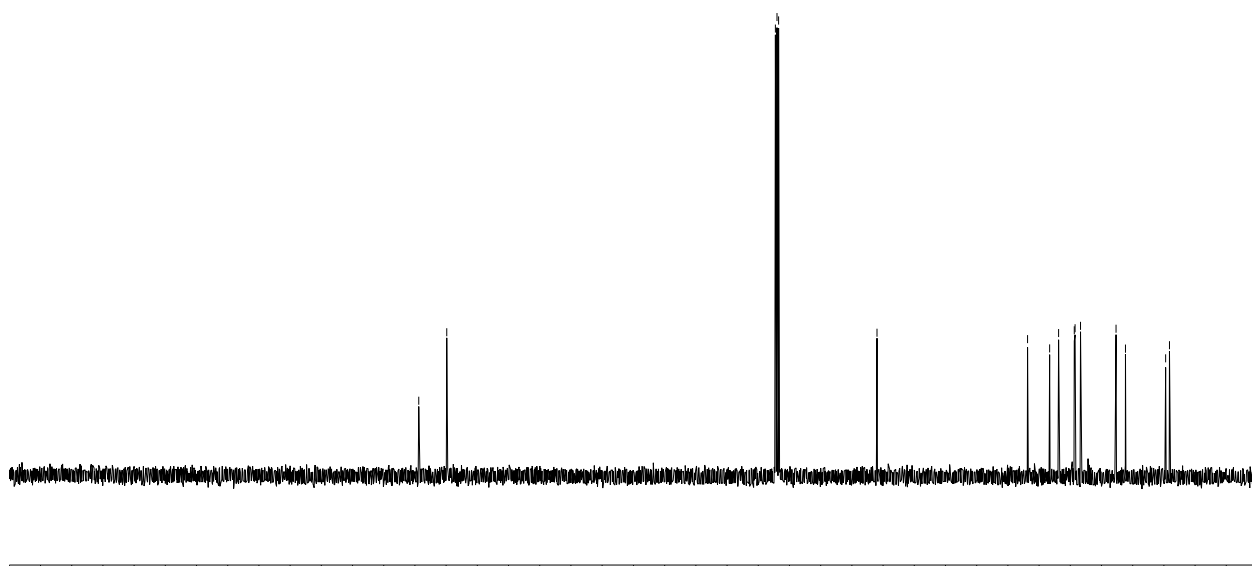

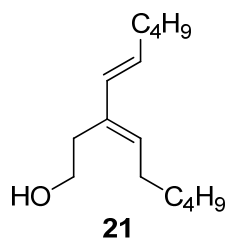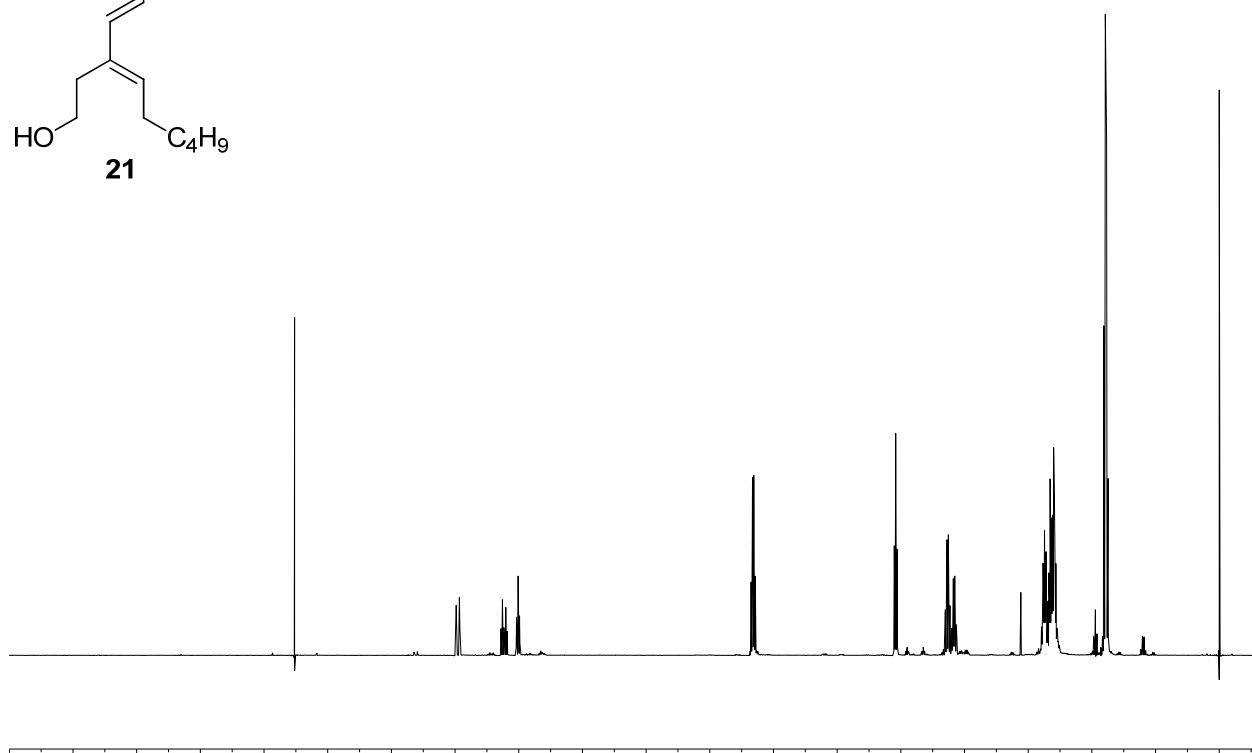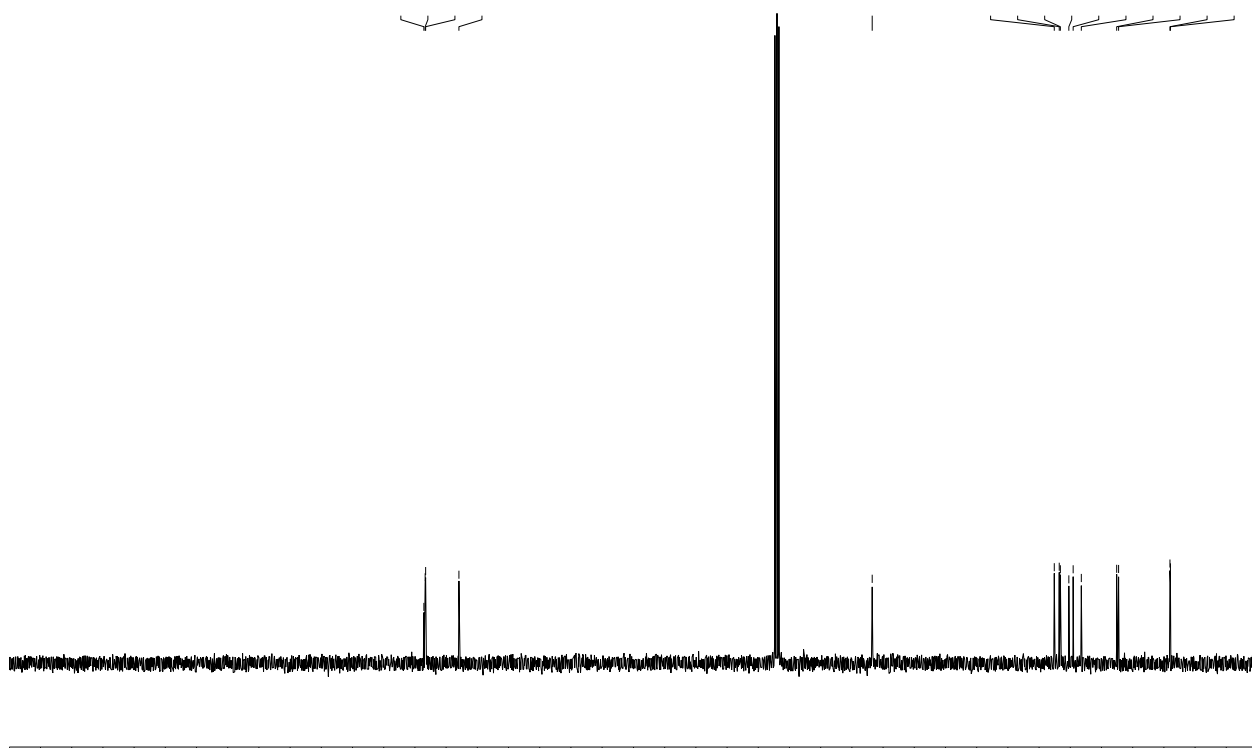

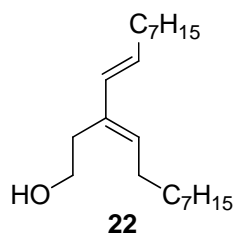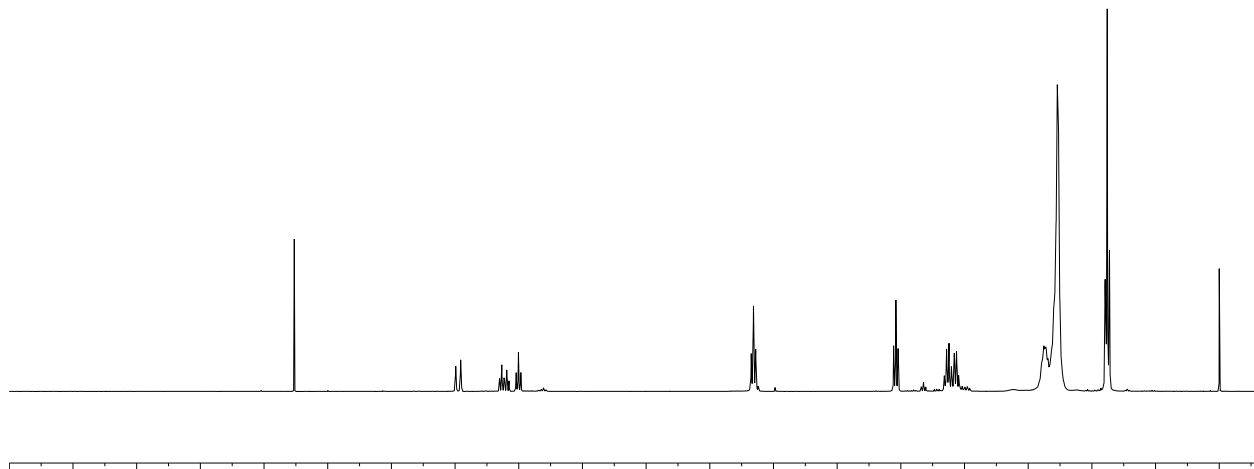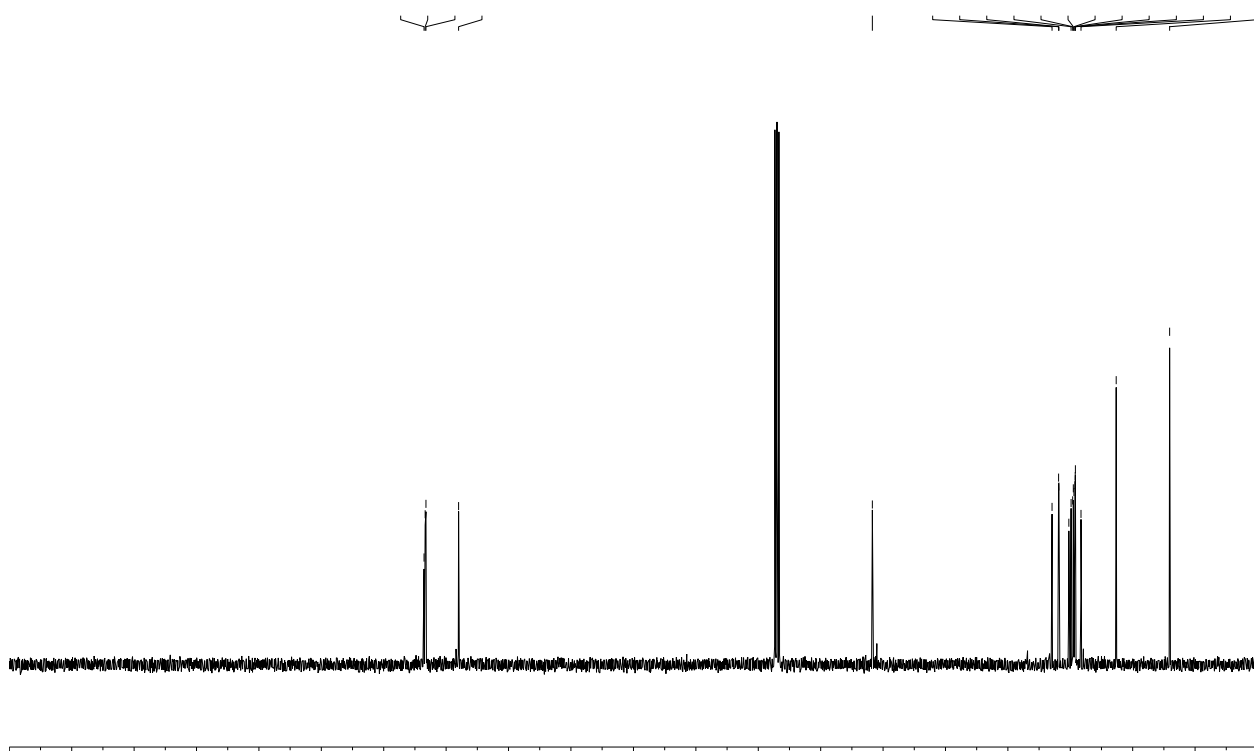

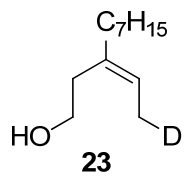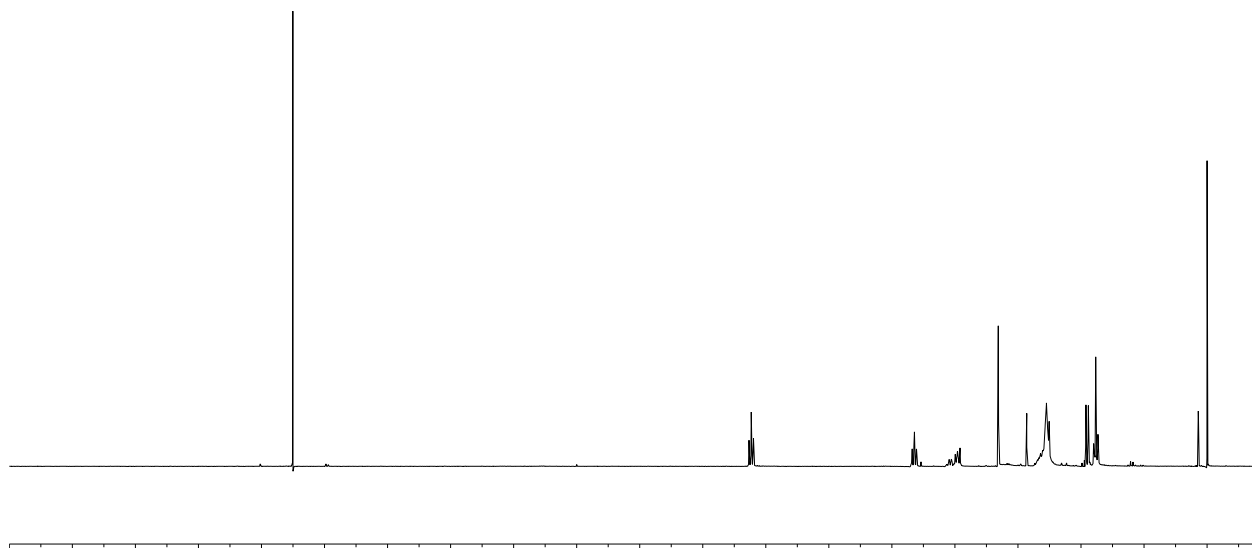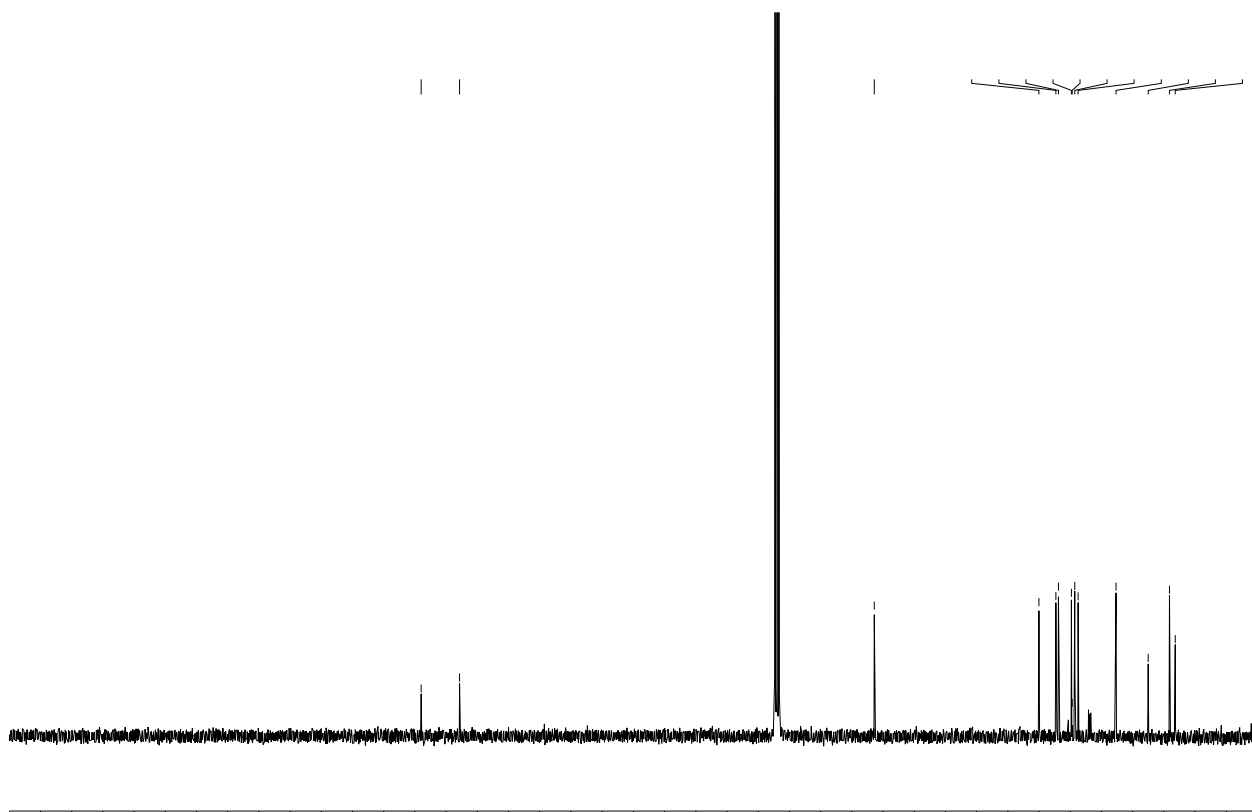



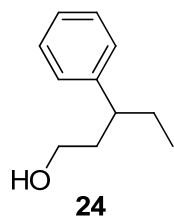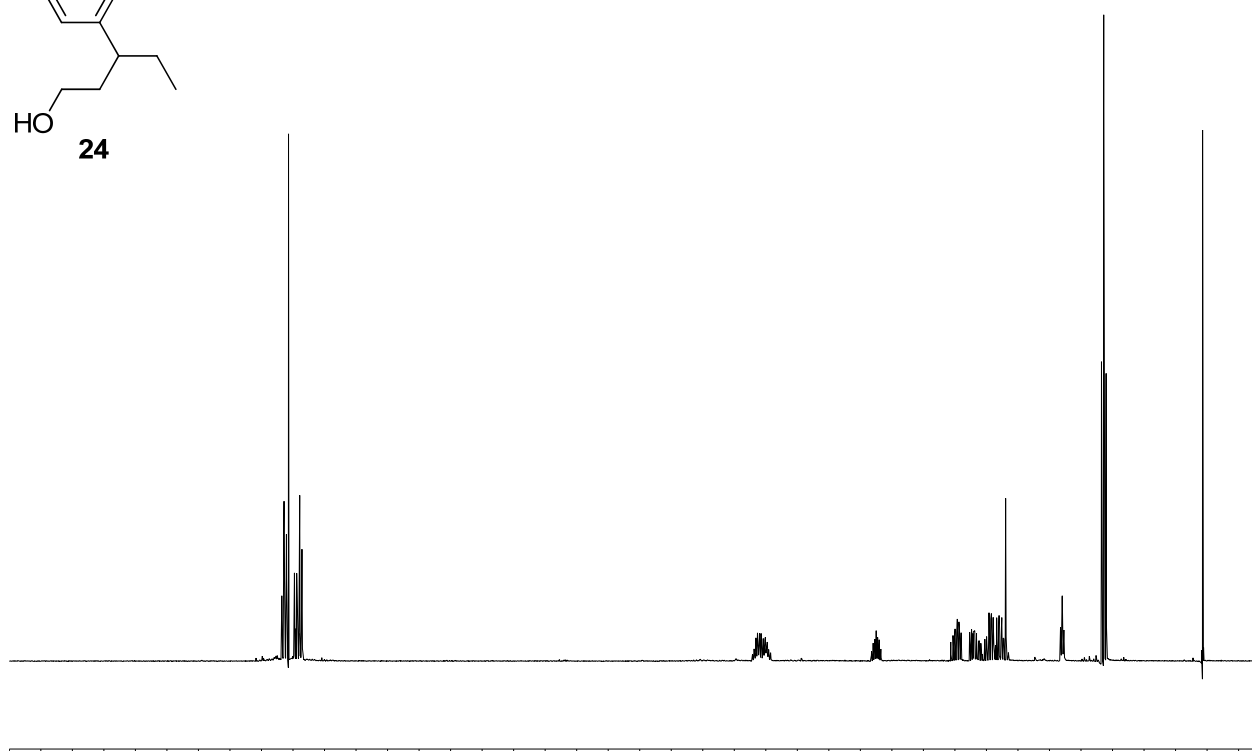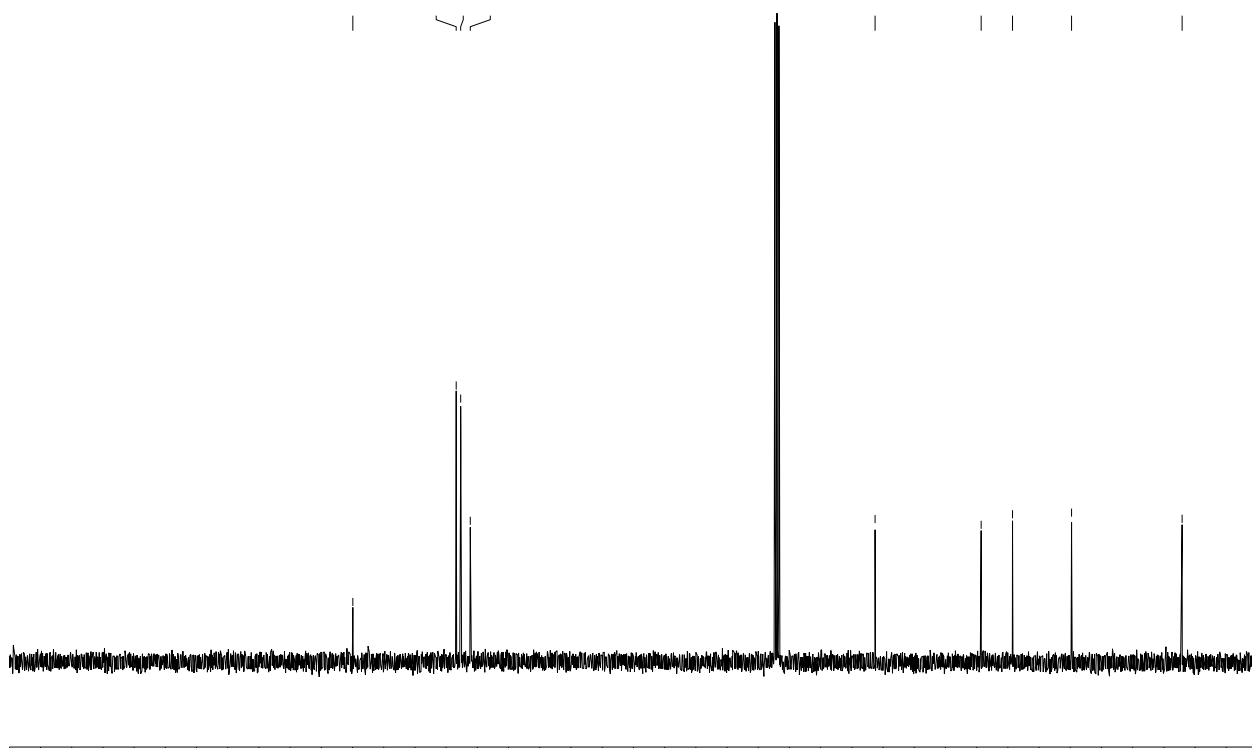

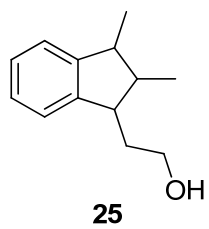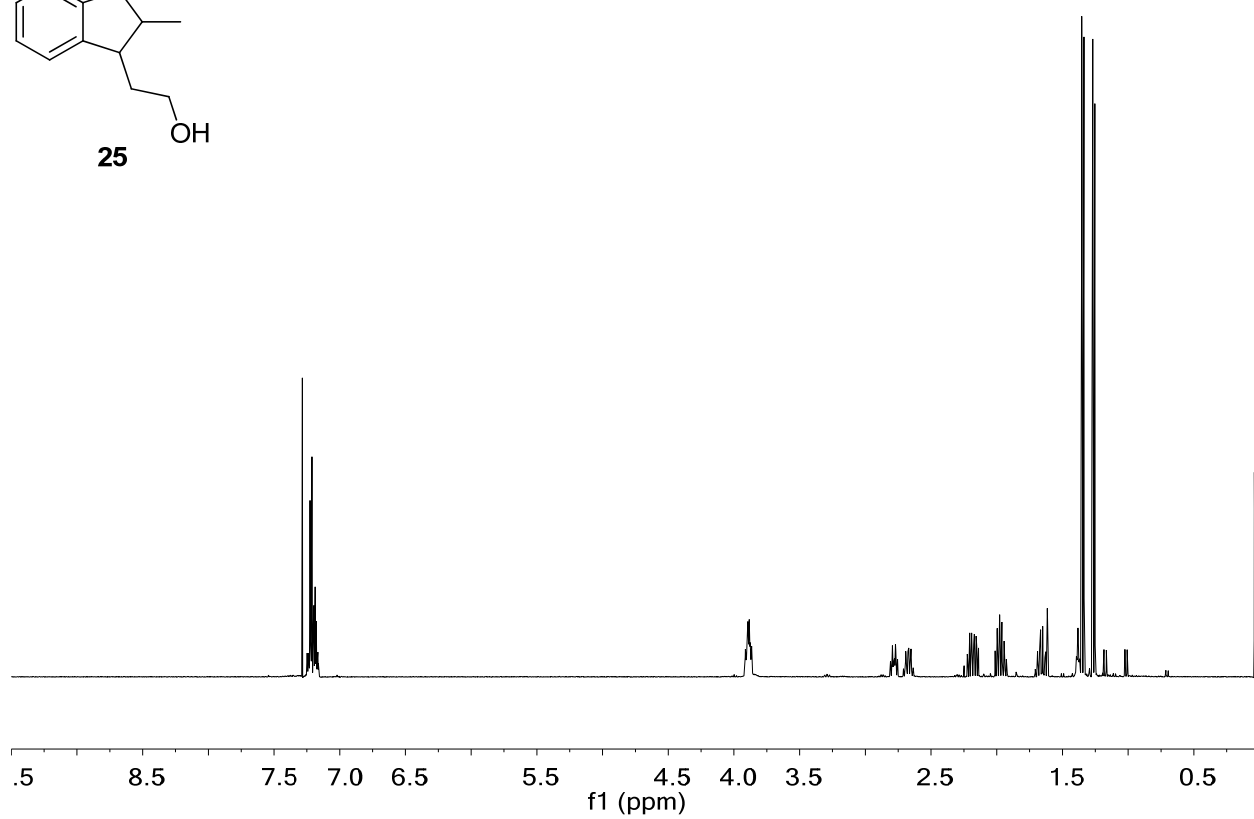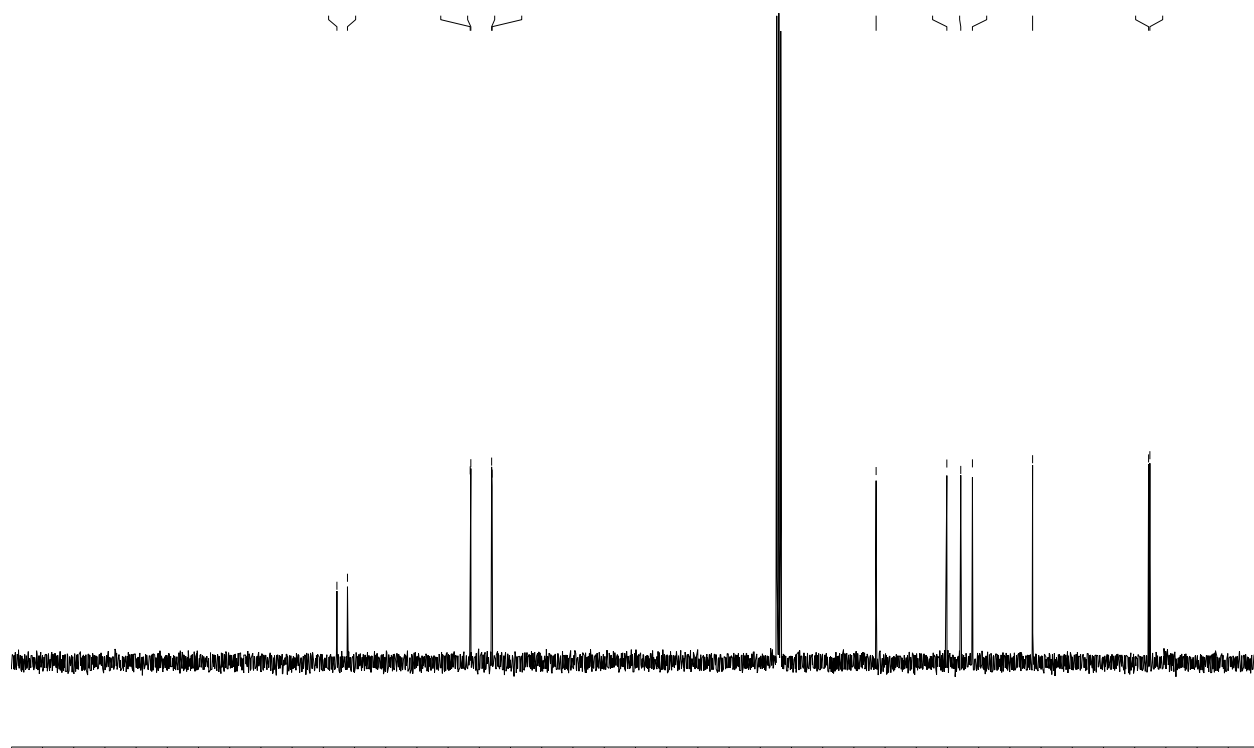

Supplement: c2cc33551d.pdf [file c2cc33551d.pdf]
